# Supplementary material for: Carbohydrate-active enzymes in Trichoderma harzianum: a bioinformatic analysis bioprospecting for key enzymes for the biofuels industry
Source: PubMed Central journal article supplement (PMC5639747; doi:10.1186/s12864-017-4181-9), 2017-10-12
Supplement: 12864_2017_4181_MOESM5_ESM.pdf [file 12864_2017_4181_MOESM5_ESM.pdf]

GH55

1

93

|                      |   |   |   |   |   |   |   |   |   |   |   |   |   |   |   |   |   |   |   |   |   |   |   |   |   |   |   |   |   |   |   |   |   |   |   |   |   |   |   |   |   |   |   |   |   |   |   |   |   |   |   |   |   |   |   |   |   |   |   |   |   |   |   |   |   |   |   |   |   |   |   |   |   |   |   |   |   |   |   |   |   |   |   |   |   |   |   |   |   |   |   |   |   |   |
|----------------------|---|---|---|---|---|---|---|---|---|---|---|---|---|---|---|---|---|---|---|---|---|---|---|---|---|---|---|---|---|---|---|---|---|---|---|---|---|---|---|---|---|---|---|---|---|---|---|---|---|---|---|---|---|---|---|---|---|---|---|---|---|---|---|---|---|---|---|---|---|---|---|---|---|---|---|---|---|---|---|---|---|---|---|---|---|---|---|---|---|---|---|---|---|---|
| 1. KKP02807.1-Th     | - | - | - | A | S | A | T | P | T | P | S | P | P | A | S | D | E | - | - | G | I | T | K | R | A | - | T | S | F | Y | Y | P | N | M | D | H | V | N | - | A | P | R | G | F | A | P | D | L | D | G | D | - | - | - | - | N | Y | P | I | Y | Q | T | V | N | A | G | D | G | N | A | L | Q | N | A | I | T | - | - | - | T | G | R | H | P | Q | W | F | A | S | Q |   |   |   |   |
| 2. EFY84429.1-Ma     | L | F | S | S | P | S | L | A | A | P | S | T | G | S | N | V | R | A | N | S | T | - | D | P | A | T | D | G | S | W | M | A | G | I | T | R | Q | G | K | A | P | F | A | - | - | A | D | D | Y | K | V | F | R | N | V | K | V | F | G | A | K | G | D | G | S | T | D | D | T | D | A | I | N | K | A | I | S | D | G | G | R | C | G | D | G | C | D | S | R | T | T | T |   |   |
| 3. XP_007825860.1-Mr | L | F | S | S | P | S | L | A | A | P | S | T | G | F | D | V | K | T | N | F | T | - | N | V | A | T | N | G | S | W | M | A | D | I | K | R | Q | G | N | A | P | F | A | - | - | N | G | T | Y | S | V | F | R | N | V | K | E | F | G | A | K | G | D | G | I | T | D | D | T | D | A | I | N | K | A | I | S | D | G | G | R | C | G | D | G | C | D | S | R | T | T | T |   |   |
| 4. EJP66720.1-Bb     | A | F | S | - | P | V | S | A | A | P | S | S | - | - | - | - | S | T | D | S | L | - | E | A | R | T | S | S | S | W | L | S | S | I | K | R | Q | G | S | V | P | - | S | - | N | S | N | F | T | V | F | R | N | V | K | D | Y | G | A | R | G | D | G | T | T | D | T | A | A | I | N | A | A | I | T | A | G | N | R | C | G | R | C | D | S | R | T | T | T |   |   |   |   |   |
| 5. EGX94485.1-Cm     | A | I | S | - | P | V | S | A | A | P | S | P | - | - | - | S | V | D | T | L | - | E | A | R | T | A | N | N | W | L | S | S | I | K | R | Q | G | T | V | P | - | S | - | N | G | N | K | V | F | R | N | V | K | D | Y | G | A | R | G | D | G | T | S | D | D | T | A | A | I | N | A | A | I | S | D | G | N | R | C | G | R | C | D | S | R | T | T | T |   |   |   |   |   |   |
| 6. XP_013940488.1-Ta | L | F | A | A | P | S | L | A | A | P | A | P | - | - | A | A | D | T | K | A | V | - | E | A | A | A | A | T | S | W | L | P | N | I | A | R | N | G | N | V | P | F | S | - | S | A | S | G | Y | P | V | Y | R | N | V | Q | T | Y | G | A | V | G | D | G | V | H | D | D | T | A | A | I | N | A | A | I | S | A | G | N | R | C | G | R | C | D | S | R | T | T | T |   |   |   |
| 7. ET801369.1-Tr     | L | F | A | A | P | P | L | A | A | P | A | P | A | P | A | A | E | E | K | A | V | - | - | - | - | A | A | A | T | S | W | L | P | N | I | A | R | Q | G | T | V | P | P | S | - | N | A | S | G | Y | Q | I | Y | R | N | V | Q | S | F | G | A | K | G | D | G | V | T | D | D | T | A | A | I | N | A | A | I | S | A | G | N | R | C | G | R | C | D | S | R | T | T | T |   |   |
| 8. XP_013949563.1-Tv | L | F | S | V | P | A | V | A | V | P | A | P | S | P | A | A | D | S | K | A | V | - | - | - | A | A | A | T | S | W | L | P | N | I | A | R | Q | G | T | V | P | F | G | - | - | G | A | G | Y | Q | I | Y | R | N | V | Q | S | F | G | A | K | G | D | G | V | T | D | D | T | A | A | I | N | A | A | I | S | S | G | N | R | C | G | R | C | D | S | R | T | T | T |   |   |   |
| 9. KKP03210.1-Th     | L | F | S | V | P | A | V | A | V | P | A | P | S | P | A | A | D | S | K | A | V | - | - | - | A | A | A | T | S | W | L | P | N | I | A | R | Q | G | T | V | P | Y | S | G | A | G | Y | Q | I | Y | R | N | V | Q | S | F | G | A | K | G | D | G | V | T | D | D | T | A | A | I | N | A | A | I | S | S | G | N | R | C | G | R | C | D | S | R | T | T | T |   |   |   |   |   |
| 10. KHE80146.1-Ne    | L | F | S | - | P | A | L | A | A | P | A | P | - | - | - | - | R | Q | A | T | - | - | - | - | - | - | G | G | W | V | S | S | I | D | R | Q | G | V | A | P | F | N | E | D | S | A | G | Y | K | V | F | R | N | V | R | D | Y | G | A | K | G | D | G | S | S | D | D | T | E | A | I | N | K | A | I | S | D | G | K | R | C | G | K | C | S | R | T | T | T |   |   |   |   |   |
| 11. KHE84528.1-Nc    | - | M | R | L | K | V | I | - | - | V | L | - | - | - | - | A | A | L | A | S | V | A | S | - | - | - | - | A | A | Y | W | M | E | E | I | Q | H | O | G | V | A | S | F | N | - | P | D | K | S | Y | H | V | F | R | N | V | K | D | Y | G | A | K | G | D | G | V | T | D | D | T | A | A | I | N | N | A | I | S | S | G | D | R | C | G | P | F | C | N | G | T | T | T |   |   |
| 12. KHE80315.1-Ne    | T | T | G | I | G | I | T | T | T | N | P | T | T | T | T | A | T | T | S | T | A | S | P | T | A | C | S | D | Y | W | L | E | N | I | A | H | Q | G | L | A | P | Y | A | - | I | P | - | G | Y | S | V | F | R | S | V | K | D | F | G | A | R | G | D | G | I | N | D | D | T | A | A | I | N | A | A | I | S | S | G | N | R | C | G | P | G | C | D | G | S | T | T | S |   |   |
| 13. XP_013957114.1-T | W | F | D | F | K | S | D | - | H | S | Q | S | K | L | L | A | K | K | P | T | P | P | P | - | P | - | T | Q | Y | W | L | D | K | I | K | H | Q | G | V | A | P | F | A | - | D | S | - | D | Y | K | V | F | R | N | V | M | D | Y | G | A | K | G | D | G | V | T | D | D | T | A | A | I | N | L | A | M | T | S | G | G | R | C | G | D | N | C | S | S | T | V | T |   |   |   |
| 14. KKP01538.1-Th    | W | F | D | F | K | A | D | - | N | G | L | H | S | K | L | A | G | K | K | P | T | P | P | P | - | P | - | T | Q | Y | W | L | D | K | I | K | H | Q | G | V | A | P | F | A | - | D | S | - | D | Y | K | V | F | R | N | V | M | D | Y | G | A | K | G | D | G | V | T | D | D | T | A | A | I | N | L | A | M | T | S | G | G | R | C | G | D | N | C | S | S | T | V | T |   |   |
| 15. KHE89051.1-Ne    | - | M | R | L | G | T | L | L | L | A | V | - | - | - | A | S | L | T | S | A | V | N | - | - | - | - | - | A | Y | W | M | G | D | I | A | H | R | G | Y | A | P | F | A | - | Y | S | - | G | Y | P | V | F | R | N | V | K | D | Y | G | A | K | G | D | G | V | T | D | D | T | A | A | I | N | A | A | I | T | A | G | N | P | C | N | O | G | C | T | S | T | T | T |   |   |   |
| 16. KKP04907.1-Th    | A | L | A | L | A | A | T | C | R | G | V | I | V | P | G | A | E | A | P | A | V | E | K | R | A | - | S | S | Y | W | Y | E | N | I | A | K | O | G | I | A | P | F | A | - | P | S | - | G | Y | T | V | Y | R | N | V | K | D | F | G | A | K | G | D | G | V | T | D | D | T | A | A | I | N | N | A | I | L | S | G | G | R | C | G | R | L | C | K | S | S | T | L | T |   |   |
| 17. XP_013953582.1-T | V | L | A | L | A | A | T | C | Q | G | V | N | T | P | G | A | K | A | E | S | T | V | E | K | R | A | - | S | T | Y | W | Y | E | N | I | A | H | Q | G | V | A | P | F | A | - | P | S | - | G | Y | T | V | Y | R | N | V | K | D | F | G | A | K | G | D | G | V | T | D | D | T | A | A | I | N | N | A | I | L | S | G | G | R | C | G | R | L | C | T | S | S | T | L | T |   |
| 18. XP_013940791.1-T | A | L | A | L | A | A | A | C | H | G | L | - | - | - | A | T | A | E | P | V | V | E | K | R | A | - | S | S | Y | W | Y | E | N | I | A | H | Q | G | V | A | P | F | A | - | P | S | - | G | Y | S | V | Y | R | N | V | K | D | Y | G | A | K | G | D | G | V | T | D | D | T | A | A | I | N | N | A | I | L | S | G | G | R | C | G | R | L | C | T | S | S | T | L | T |   |   |
| 19. KKP00524.1-Th    | - | V | I | R | G | Y | K | G | F | N | E | G | I | K | K | T | N | F | K | A | K | R | Q | S | S | D | Y | W | L | I | D | L | G | P | L | G | A | Q | P | L | A | - | G | G | - | D | Y | Q | F | F | R | N | V | D | F | G | A | D | N | S | G | D | T | I | T | E | A | L | N | A | V | A | S | D | G | N | R | C | G | E | C | G | N | I | F | S | Q |   |   |   |   |   |   |   |
| 20. EGX89976.1-Cm    | - | N | T | P | E | E | L | Q | A | P | E | G | I | R | L | S | V | F | A | G | D | A | A | E | K | R | A | - | S | T | Y | W | Y | E | N | I | A | H | Q | G | V | A | P | F | A | - | P | S | - | G | Y | T | V | Y | R | N | V | K | D | F | G | A | K | G | D | G | V | T | D | D | T | A | A | I | N | K | A | V | S | D | G | A | R | C | G | R | L | C | T | S | S | T | V | A |
| 21. XP_013957382.1-T | K | N | G | T | L | Y | K | D | Y | S | R | F | H | K | L | S | K | R | Q | P | L | E | E | R | A | S | G | - | Y | W | M | A | N | L | G | T | - | - | - | Q | P | F | G | - | N | D | A | S | Y | K | V | F | R | N | V | K | D | Y | G | A | K | G | D | G | V | T | D | D | T | A | A | I | N | N | A | I | T | G | N | R | C | G | E | N | G | S | S | S | V | K |   |   |   |   |
| 22. EJP61727.1-Bb    | G | N | Y | T | - | - | R | R | A | A | A | A | A | G | K | G | T | F | W | M | Q | L | T | W | T | F | L | V | S | H | G | K | Y | I | K | K | F | - | W | M | S | L | P | - | N | Q | S | I | K | V | I | F | R | N | V | L | D | Y | G | A | V | G | D | G | V | T | D | D | T | K | A | I | N | K | A | M | G | T | S | T | R | C | D | R | G | C | N | G | S | T | T | K |   |   |
| 23. KHE81590.1-Ne    | K | N | Y | T | - | - | K | R | A | A | T | A | S | T | G | T | Y | W | M | O | G | L | D | R | K | G | T | I | - | - | D | R | Q | L | R | - | - | - | S | S | F | P | - | N | Q | E | V | Q | A | I | F | R | N | V | L | D | Y | G | A | V | G | D | G | I | T | D | D | T | K | A | I | N | R | A | M | G | T | S | T | R | C | G | K | C | N | G | S | T | T | K |   |   |   |   |
| 24. OAQ59871.1-Pe    | - | - | - | N | A | A | R | D | I | L | E | T | A | H | A | T | D | S | L | K | E | C | L | K | S | S | H | G | A | P | F | W | M | E | T | I | H | H | T | G | I | S | P | F | L | - | N | D | S | S | Y | T | V | Y | R | N | V | K | D | F | G | A | K | G | D | G | V | T | D | D | T | A | A | I | Q | K | A | I | D | D | R | C | G | C | G | D | P | P | A | K | T | L | K |   |
| 25. XP_013940496.1-T | S | R | L | T | A | R | D | L | T | V | S | L | D | A | S | L | T | F | G | Q | C | H | P | V | I | R | H | E | D | F | W | M | E | T | I | K | H | T | G | V | S | P | F | L | - | N | D | S | S | Y | T | V | Y | R | N | V | K | D | F | G | A | K | G | D | G | K | T | D | D | T | A | A | I | Q | A | A | I | D | A | R | C | G | C | G | D | - | P | P | A | K | T | L | K |   |
| 26. XP_013954419.1-T | E | A | L | V | D | R | A | L | T | A | S | L | D | A | S |   |   |   |   |   |   |   |   |   |   |   |   |   |   |   |   |   |   |   |   |   |   |   |   |   |   |   |   |   |   |   |   |   |   |   |   |   |   |   |   |   |   |   |   |   |   |   |   |   |   |   |   |   |   |   |   |   |   |   |   |   |   |   |   |   |   |   |   |   |   |   |   |   |   |   |   |   |   |   |

|                       |   |   |   |   |   |   |   |   |   |   |   |   |   |   |   |   |   |   |   |   |   |   |   |   |   |   |   |   |   |   |   |   |   |   |   |   |   |   |   |   |   |   |   |   |   |   |   |   |   |   |   |   |   |   |   |   |   |   |   |   |   |   |   |   |   |   |   |   |   |   |   |   |   |   |   |   |   |   |   |   |   |   |   |   |   |   |   |   |   |   |   |   |
|-----------------------|---|---|---|---|---|---|---|---|---|---|---|---|---|---|---|---|---|---|---|---|---|---|---|---|---|---|---|---|---|---|---|---|---|---|---|---|---|---|---|---|---|---|---|---|---|---|---|---|---|---|---|---|---|---|---|---|---|---|---|---|---|---|---|---|---|---|---|---|---|---|---|---|---|---|---|---|---|---|---|---|---|---|---|---|---|---|---|---|---|---|---|---|
| 1. KKP02807.1-Th      | P | R | V | V | I | P | P | G | T | Y | T | I | S | K | T | L | R | F | N | T | D | T | I | L | M | G | D | P | T | N | P | P | I | K | A | A | A | G | F | S | G | D | O | T | L | I | S | A | Q | - | D | P | S | T | - | - | N | E | K | G | E | L | S | F | A | V | A | I | K | N | V | V | L | D | T | T | A | I | L | G | G | N | S | T | A | L | W | G | V | A |   |   |
| 2. EFY84429.1-Ma      | P | A | L | V | Y | F | P | P | G | T | Y | V | V | S | K | P | I | I | Q | Y | Y | T | Q | L | V | G | D | A | V | S | V | P | T | L | K | A | R | A | D | F | E | G | - | I | A | V | - | - | I | D | S | N | P | Y | N | - | - | W | H | T | N | Q | N | N | F | F | R | Q | I | R | N | F | V | I | D | L | T | G | L | R | - | Q | E | T | T | G | I | H | W | Q | V | A |
| 3. XP_007825860.1-Mr  | P | A | L | V | Y | F | P | P | G | T | Y | V | V | S | K | P | I | I | Q | Y | Y | T | Q | L | V | G | D | A | V | S | V | P | T | L | K | A | S | A | N | F | E | G | - | I | A | V | - | - | I | D | S | N | P | Y | N | - | - | W | H | T | N | Q | N | N | F | F | R | Q | I | R | N | F | V | I | D | L | T | G | L | R | - | Q | E | T | T | G | I | H | W | Q | V | A |
| 4. EJP66720.1-Bb      | P | A | L | V | Y | F | P | P | G | T | Y | V | V | S | K | P | I | I | Q | Y | Y | T | Q | L | V | G | D | A | V | S | V | P | T | L | K | A | S | A | N | F | Q | G | - | I | A | V | - | - | I | D | S | N | P | Y | N | - | - | W | Y | T | N | Q | N | N | F | F | R | H | I | R | N | F | K | I | D | I | T | A | Q | G | - | K | S | T | T | G | L | H | W | Q | V | A |
| 5. EGX94485.1-Cm      | P | A | L | V | Y | F | P | P | G | T | Y | V | V | S | K | P | I | I | Q | Y | Y | T | Q | L | V | G | D | A | V | S | V | P | T | L | K | A | A | P | N | F | E | G | - | M | A | V | - | - | I | D | S | D | P | Y | N | - | - | W | Y | T | N | Q | N | N | F | F | R | Q | I | R | N | F | K | I | D | L | T | G | Q | P | - | K | S | T | T | G | I | H | W | Q | V | A |
| 5. XP_013940488.1-Ta  | P | A | I | V | Y | F | P | P | G | T | Y | L | V | S | A | P | I | Q | L | W | Y | Y | T | Q | L | I | G | D | A | T | N | L | P | T | L | K | A | S | A | N | F | A | G | - | I | A | V | - | - | I | D | S | N | P | - | - | - | R | T | T | P | O | N | N | F | F | R | Q | I | R | N | F | K | I | D | L | T | G | Q | P | - | E | S | T | T | G | I | H | W | Q | V | A |
| 7. ET801369.1-Tr      | P | A | I | V | Y | F | P | P | G | T | Y | M | V | S | S | P | I | L | L | Y | Y | T | H | L | I | G | D | A | T | N | L | P | T | L | K | S | T | A | N | F | T | G | - | I | A | V | - | - | I | D | S | N | P | - | - | - | W | Y | G | A | T | N | N | F | F | R | Q | I | R | N | F | K | I | D | V | S | G | Q | P | - | L | N | T | T | G | I | R | W | R | V | A |   |
| 8. XP_013949563.1-Tv  | P | A | I | V | Y | F | P | P | G | T | Y | V | V | S | S | P | I | Q | L | Y | Y | T | H | L | I | G | D | A | T | N | L | P | T | L | K | A | S | R | N | F | A | G | - | I | A | V | - | - | I | D | S | N | P | - | - | - | W | Y | G | A | T | N | N | F | F | R | Q | I | R | N | F | K | I | D | L | T | G | Q | P | - | I | N | T | T | G | I | R | W | R | V | A |   |
| 9. KKP03210.1-Th      | P | A | I | V | Y | F | P | P | G | T | Y | V | V | S | S | P | I | Q | L | Y | Y | T | H | L | I | G | D | A | T | N | L | P | T | L | K | A | S | R | N | F | A | G | - | I | A | V | - | - | I | D | S | N | P | - | - | - | W | Y | G | A | T | N | N | F | F | R | Q | I | R | N | F | K | I | D | L | T | G | Q | P | - | I | N | T | T | G | I | R | W | R | V | A |   |
| 10. KHE80146.1-Nc     | P | A | L | V | Y | F | P | P | G | T | Y | V | V | S | K | P | I | Q | L | Y | Y | T | Q | L | V | G | D | A | V | S | P | T | L | Q | A | A | P | N | F | E | G | - | M | A | V | - | - | I | D | S | D | P | Y | N | - | - | W | W | V | N | Q | N | N | F | F | R | Q | I | R | N | F | V | I | D | L | T | K | M | P | - | V | N | K | A | I | H | W | Q | V | A |   |   |
| 11. KHE84528.1-Nc     | P | A | V | V | Y | F | P | A | G | T | Y | L | I | T | N | I | I | N | Y | Y | T | Q | I | I | G | D | P | T | S | M | P | V | I | K | G | S | P | D | F | O | S | Y | G | G | I | G | L | I | D | S | D | P | Y | L | - | - | Q | F | R | A | T | N | V | F | F | R | Q | I | R | N | L | I | F | D | T | D | V | P | - | - | G | - | L | H | W | P | S | S |   |   |   |   |
| 12. KHE80315.1-Nc     | P | A | L | V | Y | F | P | P | G | T | Y | L | V | S | R | P | I | I | D | Y | Y | T | Q | I | I | G | N | A | R | C | P | P | T | I | K | A | S | G | N | F | T | A | - | N | W | V | - | - | I | D | S | N | P | Y | L | - | - | A | W | G | S | T | N | V | F | W | R | Q | I | S | N | F | I | I | D | M | T | A | A | P | P | T | D | A | G | I | H | W | P | S | S |   |
| 13. XP_013957114.1-Tv | P | A | I | V | Y | F | P | P | G | T | Y | V | V | S | S | P | I | I | D | Y | Y | T | M | M | I | G | D | A | V | N | L | P | T | L | K | A | S | P | N | F | G | G | - | V | G | L | G | V | I | D | G | D | K | N | I | - | - | W | G | P | T | N | I | F | Y | R | Q | V | A | N | F | I | I | D | L | T | D | V | P | - | P | V | N | T | G | I | H | W | P | T | A |   |
| 14. KKP01538.1-Th     | P | A | I | V | Y | F | P | P | G | T | Y | V | V | S | S | P | I | I | D | Y | Y | T | M | M | I | G | D | A | V | N | L | P | T | L | K | A | S | P | N | F | G | G | - | V | G | L | G | V | I | D | G | D | K | N | I | - | - | W | G | P | T | N | I | F | Y | R | Q | V | A | N | F | I | I | D | L | T | D | V | P | - | P | V | N | T | G | I | H | W | P | T | A |   |
| 15. KHE89051.1-Nc     | P | A | V | V | Y | F | P | A | G | T | Y | L | I | S | G | S | I | K | P | A | Y | F | T | Q | L | I | G | D | A | S | S | P | T | L | K | A | T | A | N | F | A | G | - | F | G | L | - | - | I | D | A | N | P | Y | L | - | - | N | W | K | A | V | N | V | F | F | R | Q | I | R | N | F | I | I | D | T | T | N | I | P | - | P | A | N | - | G | I | H | W | P | S | S |
| 16. KKP04907.1-Th     | P | A | I | V | Y | F | P | A | G | T | Y | L | I | S | T | P | I | I | D | Q | Y | T | N | I | I | G | D | A | T | N | L | P | T | I | K | A | T | A | N | F | N | G | - | I | A | L | - | - | I | D | G | D | T | Y | P | - | - | N | W | I | S | T | N | V | F | Y | R | Q | V | R | N | F | K | L | D | M | T | S | I | P | - | A | S | A | - | G | I | H | W | P | T | A |
| 17. XP_013953582.1-Tv | P | A | I | V | Y | F | P | A | G | T | Y | L | I | S | T | P | I | I | D | Q | Y | T | N | I | I | G | D | P | T | N | L | P | T | I | K | A | T | A | G | F | N | G | - | I | A | L | - | - | I | D | G | D | T | Y | P | - | - | N | W | I | S | T | N | V | F | Y | R | Q | V | R | N | F | K | L | D | M | T | S | I | P | - | A | S | A | - | G | I | H | W | P | T | A |
| 18. XP_013940791.1-Ta | P | A | V | V | Y | F | P | A | G | T | Y | V | I | S | T | P | I | I | D | Q | Y | T | N | I | I | G | D | P | T | N | L | P | T | I | K | A | T | A | G | F | N | G | - | I | A | L | - | - | I | D | G | D | T | Y | P | - | - | N | W | I | S | T | N | V | F | Y | R | Q | V | R | N | F | K | L | D | M | T | A | M | P | - | A | S | A | - | A | I | H | W | P | T | A |
| 19. KKP00524.1-Th     | G | A | I | V | Y | F | P | P | G | T | Y | K | I | C | S | P | V | I | Q | Y | Y | T | Q | F | I | G | D | P | N | M | P | T | I | K | G | C | D | T | F | A | G | - | I | A | L | - | - | F | D | T | D | P | Y | Q | - | - | W | Y | V | N | Q | N | Q | F | F | R | Q | I | R | N | F | E | F | D | L | T | D | M | P | E | S | T | A | T | G | I | H | W | Q | V | A |   |
| 20. EGX89976.1-Cm     | P | A | V | V | Y | F | P | P | G | T | Y | L | V | S | G | S | I | I | Q | Y | N | T | Q | F | L | G | D | P | N | V | P | T | I | L | A | A | S | S | F | V | G | - | L | G | V | - | - | F | T | S | N | K | Y | G | - | - | W | Y | L | N | T | A | N | F | L | R | S | I | R | N | F | K | I | D | I | R | L | D | P | Y | A | C | A | I | H | W | Q | V | A |   |   |   |
| 21. XP_013957382.1-Tv | G | A | V | V | Y | F | P | P | G | T | Y | L | V | S | G | S | I | V | A | Y | F | H | T | Q | M | V | G | D | P | T | N | L | P | V | I | K | A | S | A | S | F | V | G | - | L | G | V | - | - | I | S | T | D | V | Y | V | P | E | W | Y | I | N | T | A | N | F | Y | R | Q | I | R | N | F | I | I | D | I | T | A | D | Q | G | A | - | A | A | L | H | Y | Q | V | A |
| 22. EJP61727.1-Bb     | N | A | I | V | Y | F | P | P | G | K | Y | L | V | S | S | T | I | A | M | P | F | G | T | O | V | I | G | D | A | N | D | R | P | T | L | V | A | A | P | S | F | V | G | - | L | G | V | - | - | L | S | T | D | E | Y | T | G | E | Y | F | V | N | T | A | N | F | Y | R | Q | I | R | N | I | R | I | D | I | R | K | V | K | E | G | - | T | G | I | H | Y | Q | V | A |
| 23. KHE81590.1-Nc     | N | A | I | V | Y | F | P | P | G | T | Y | L | V | S | S | T | I | P | L | P | F | G | T | O | V | I | G | D | A | N | R | P | T | L | V | A | A | P | S | F | V | G | - | L | G | V | - | - | L | S | T | D | E | Y | T | G | E | Y | F | V | N | T | A | N | F | Y | R | Q | I | R | N | I | V | I | D | I | Q | K | V | T | S | G | T | - | T | C | L | H | Y | Q | V | A |
| 24. OAQ59871.1-Pc     | P | A | L | I | Y | F | P | S | G | T | Y | K | I | K | S | L | N | I | Y | I | Y | T | Q | L | V | G | N | P | L | D | R | P | T | I | K | A | D | A | A | F | N | D | - | L | Y | L | - | - | L | N | A | F | P | S | S | - | - | P | F | P | T | I | N | L | Y | L | Q | V | R | N | F | V | F | D | T | T | N | V | D | K | R | S | S | A | C | V | N | W | P | S | A |   |
| 25. XP_013940496.1-Ta | P | A | L | I | Y | F | P | S | G | T | Y | K | I | S | R | T | L | N | S | Y | I | Y | T | Q | L | V | G | N | P | L | D | R | P | V | L | K | A | D | K | N | F | S | G | - | L | Y | L | - | - | L | D | T | F | P | S | S | - | - | P | F | P | T | I | N | L | Y | Q | V | R | N | F | V | F |   |   |   |   |   |   |   |   |   |   |   |   |   |   |   |   |   |   |   |

|                       |   |   |   |   |   |   |   |   |   |   |   |   |   |   |   |   |   |   |   |   |   |   |   |   |   |   |   |   |   |   |   |   |   |   |   |   |   |   |   |   |   |   |   |   |   |   |   |   |   |   |   |   |   |   |   |   |   |   |   |   |   |   |   |   |   |   |     |   |   |   |   |   |   |   |   |   |   |   |   |   |   |   |   |   |   |   |   |   |   |   |   |   |   |
|-----------------------|---|---|---|---|---|---|---|---|---|---|---|---|---|---|---|---|---|---|---|---|---|---|---|---|---|---|---|---|---|---|---|---|---|---|---|---|---|---|---|---|---|---|---|---|---|---|---|---|---|---|---|---|---|---|---|---|---|---|---|---|---|---|---|---|---|---|-----|---|---|---|---|---|---|---|---|---|---|---|---|---|---|---|---|---|---|---|---|---|---|---|---|---|---|
| 1. KKP02807.1-Th      | Q | A | A | H | L | Q | N | V | R | I | T | M | S | S | S | - | G | G | N | - | G | H | T | G | I | R | M | G | R | G | - | S | T | L | G | L | A | D | V | R | V | E | R | G | Q | N | G | I | W | I | D | G | H | Q | Q | A | S | F | H | N | I | Y | F | Y | Q | N | T   | V | A | M | L | I | S | G | G | N | T | F | S | I | F | S | S | T | F | D | T | C | G | T | G | I | S |
| 2. EFX84429.1-Ma      | Q | A | T | S | L | Q | N | I | V | F | N | M | V | Q | N | K | T | S | K | N | K | Q | Q | G | I | F | M | E | N | G | - | S | G | G | F | M | S | D | L | T | F | N | G | G | L | G | A | F | L | - | G | N | Q | Q | F | T | T | R | N | L | K | F | N | N | C | Q | T   | A | I | F | M | N | N | W | V | W | T | L | H | G | I | S | I | D | S | C | D | V | G | I | N |   |   |
| 3. XP_007825860.1-Mr  | Q | A | T | S | L | Q | N | I | V | F | N | M | V | Q | S | K | S | S | Q | N | K | Q | Q | G | I | F | M | E | N | G | - | S | G | G | F | M | S | D | L | T | F | N | G | G | L | G | A | F | F | - | G | N | Q | Q | F | T | T | R | N | L | K | F | N | N | C | Q | T   | A | I | F | M | N | N | W | V | W | T | L | H | G | I | S | I | D | N | C | D | V | G | I | N |   |   |
| 4. EJP66720.1-Bb      | Q | A | T | S | L | Q | N | I | Q | F | D | M | I | K | D | K | S | S | D | N | K | Q | Q | G | I | F | T | E | N | G | - | S | G | G | F | M | S | D | L | T | F | N | G | G | N | L | G | V | F | W | - | G | A | Q | Q | F | T | T | R | N | L | K | F | N | G | C | R   | T | A | I | Y | M | N | N | W | A | W | T | F | H | G | L | N | I | D | S | C | D | I | G | L | D |   |
| 5. EGX94485.1-Cm      | Q | A | T | S | L | Q | N | I | Q | F | D | M | I | N | D | K | S | S | D | N | K | Q | Q | G | I | F | T | E | N | G | - | S | G | G | F | M | S | D | L | T | F | N | G | G | N | L | G | V | F | W | - | G | A | Q | Q | F | T | T | R | N | L | K | F | N | G | C | R   | T | A | I | Y | M | N | N | W | A | W | T | F | H | G | L | N | I | D | S | C | D | I | G | L | D |   |
| 6. XP_013940488.1-Ta  | Q | A | T | S | I | Q | N | V | V | F | N | M | N | T | D | T | S | S | N | N | K | Q | Q | G | I | W | M | E | D | G | - | S | G | G | W | M | S | D | L | T | F | N | G | G | L | G | M | V | W | - | G | N | Q | Q | F | T | S | R | N | L | V | F | N | G | C | Q | T   | A | I | Y | M | N | N | W | L | S | F | O | G | L | T | I | N | N | A | N | V | G | I | D |   |   |   |
| 7. ETS01369.1-Tr      | Q | A | T | S | I | Q | N | V | Q | F | I | M | N | G | D | T | S | T | N | N | K | Q | Q | G | I | W | G | E | D | G | - | S | G | G | W | L | S | D | L | T | F | T | G | G | A | L | G | I | W | I | - | G | N | Q | Q | F | T | S | R | N | L | V | F | N | G | C | Q   | T | A | I | Y | M | N | N | W | L | S | F | H | G | L | T | I | N | N | A | N | V | G | I | D |   |   |
| 8. XP_013949563.1-Tv  | Q | A | T | S | I | Q | N | V | Q | F | I | M | N | G | D | T | S | T | N | N | K | Q | Q | G | I | W | G | E | D | G | - | S | G | G | W | L | S | D | L | T | F | N | G | G | A | L | G | M | V | W | - | G | N | Q | Q | F | T | S | R | N | L | V | F | N | G | C | Q   | T | A | I | Y | M | N | N | W | L | S | F | H | G | L | T | I | N | N | A | N | V | G | I | D |   |   |
| 9. KKP03210.1-Th      | Q | A | T | S | I | Q | N | V | Q | F | I | M | N | G | D | T | S | T | N | N | K | Q | Q | G | I | W | G | E | D | G | - | S | G | G | W | L | S | D | L | T | F | T | G | G | A | L | G | M | V | W | - | G | N | Q | Q | F | T | S | R | N | L | V | F | N | G | C | Q   | T | A | I | Y | M | N | N | W | L | S | F | H | G | L | T | I | N | N | A | N | V | G | I | D |   |   |
| 10. KHE80146.1-Nc     | Q | A | T | S | L | Q | N | L | V | F | N | M | R | K | D | G | G | A | E | N | A | Q | Q | G | I | F | M | D | N | G | - | S | G | G | F | M | T | D | L | T | F | N | G | G | K | F | G | A | F | F | - | G | N | Q | Q | F | T | T | R | N | L | V | F | N | G | C | K   | T | A | I | Y | M | N | N | W | A | N | T | F | Q | G | V | E | I | N | N | C | E | V | G | I | D |   |
| 11. KHE84528.1-Nc     | Q | A | T | S | I | Q | N | C | V | F | K | L | S | S | - | - | R | P | E | D | D | H | T | G | I | F | I | E | E | G | - | S | G | G | M | L | A | D | L | V | F | Y | G | G | K | Q | G | A | Q | F | - | G | N | Q | Q | Y | T | M | R | N | L | T | F | Y | G | S | K   | T | A | I | M | Q | L | W | N | W | G | W | T | Y | K | S | L | N | I | Y | D | C | E | V | G | I | N |
| 12. KHE80315.1-Nc     | Q | A | T | S | L | Q | N | I | E | F | R | M | S | R | - | - | E | I | G | T | T | Q | Q | G | I | F | I | E | S | G | - | S | G | G | Y | L | G | D | L | T | F | N | G | G | R | Y | L | Q | V | - | G | N | Q | Q | F | T | M | R | N | L | V | F | N | N | Q | T | A   | I | R | Q | I | W | S | W | G | W | T | Y | Q | G | I | S | I | N | N | C | G | V | G | F | D |   |   |
| 13. XP_013957114.1-Tv | Q | A | T | S | I | Q | N | V | R | I | L | M | S | D | - | - | A | P | N | T | A | H | Q | G | I | F | M | E | D | G | - | S | G | G | F | L | T | D | I | T | F | V | G | G | K | F | G | A | Q | F | - | G | S | Q | Q | F | T | M | R | N | L | T | F | H | N | A | Q   | T | A | I | R | Q | G | F | D | W | G | W | T | Y | A | G | I | T | I | N | N | C | S | V | G | L | D |
| 14. KKP01558.1-Th     | Q | A | T | S | I | Q | N | V | R | I | V | M | S | D | - | - | A | P | N | T | A | H | Q | G | I | F | M | E | D | G | - | S | G | G | F | L | T | D | I | T | F | I | G | G | K | F | G | A | Q | F | - | G | S | Q | Q | F | T | M | R | N | L | T | F | H | N | A | Q   | T | A | I | R | Q | G | F | D | W | G | W | T | Y | A | G | I | T | I | N | N | C | S | V | G | L | D |
| 15. KHE89051.1-Nc     | Q | A | T | S | L | Q | N | I | V | F | N | M | P | T | - | - | A | S | N | V | V | H | V | G | L | F | V | E | N | G | - | S | G | G | F | V | T | D | L | T | F | N | G | G | A | T | G | A | S | M | - | G | N | Q | Q | F | T | M | R | N | L | K | F | N | N | C | K   | T | A | I | Y | H | L | W | N | W | G | W | T | Y | S | G | L | S | I | N | N | C | G | V | G | F | D |
| 16. KKP04907.1-Th     | Q | A | T | S | L | Q | N | I | Q | V | T | M | S | T | - | - | A | S | G | N | Q | Q | V | G | L | F | V | E | N | G | - | S | G | G | F | L | T | D | I | T | F | N | G | L | I | G | A | A | V | - | G | N | Q | Q | F | T | M | R | N | L | V | F | N | N | C | G | T   | A | I | V | S | G | F | T | W | E | W | Y | O | G | I | S | I | N | N | C | S | V | G | L | D |   |   |
| 17. XP_013953582.1-Tv | Q | A | T | S | L | Q | N | I | Q | V | T | M | S | T | - | - | A | S | G | N | Q | Q | V | G | L | F | V | E | N | G | - | S | A | G | F | L | T | D | M | T | F | N | G | L | I | G | A | S | V | - | G | N | Q | Q | Y | T | M | R | N | L | V | F | N | N | C | G | T   | A | I | V | S | G | F | T | W | E | W | Y | O | G | I | S | I | N | N | C | Q | L | G | I | D |   |   |
| 18. XP_013940791.1-Ta | Q | A | T | S | L | Q | N | I | Q | I | T | M | S | T | - | - | A | S | G | N | Q | Q | V | G | L | F | V | E | N | G | - | S | A | G | F | L | T | D | L | T | I | N | G | L | I | G | A | A | I | - | G | N | Q | Q | Y | T | M | R | N | L | V | F | N | N | C | G | T   | A | I | V | S | G | F | D | W | E | W | Y | O | G | I | T | I | N | N | C | G | V | G | L | D |   |   |
| 19. KKP00524.1-Th     | Q | A | T | S | L | Q | N | L | I | F | - | - | S | M | P | T | S | T | T | A | V | G | I | F | S | E | N | G | - | S | G | G | F | V | S | N | L | I | F | D | G | N | I | G | W | R | A | - | G | S | Q | Q | Y | T | A | R | N | L | Q | F | N | F | C | N | T | A | I   | Q | M | V | W | D | W | G | T | W | Q | I | D | I | N | G | S | I | A | F | N |   |   |   |   |   |   |
| 20. EGX89976.1-Cm     | Q | G | S | S | L | E | N | I | E | F | Y | M | L | F | K | D | V | P | H | S | T | Q | Q | G | I | Y | M | E | N | G | - | S | G | G | F | L | A | D | L | I | F | V | G | N | F | G | A | Y | F | - | G | N | Q | Q | F | T | T | S | H | L | V | F | V | Q | A | R | T   | A | V | Q | V | H | W | D | W | A | N | T | M | H | D | F | I | E | S | C | E | N | G | L | V |   |   |
| 21. XP_013957382.1-Tv | Q | A | T | S | L | T | N | I | Q | F | - | - | V | S | Q | N | A | G | T | Q | A | I | Y | A | E | N | G | - | S | G | G | F | M | S | D | L | I | F | E | G | G | A | F | G | I | Y | G | - | G | N | Q | Q | F | T | A | M | R | L | Q | F | I | N | C | T | V | A | V   | K | L | I | W | D | W | G | I | W | R | E | I | H | I | S | G | S | Q | T | G | I | S |   |   |   |   |
| 22. EJP61727.1-Bb     | Q | A | T | S | T | Q | N | V | E | L | - | - | I | A | Q | S | - | - | G | T | D | Q | I | G | M | Y | A | E | N | G | - | S | G | G | S | I | S | D | I | T | F | T | G | G | V | G | L | K | A | - | G | S | Q | Q | F | T | A | Q | R | L | N | F | D | G | C | D | V   | G | I | Q | V | I | W | D | W | G | W | V | K | S | I | T | M | K | N | V | G | I | G | F | K |   |   |
| 23. KHE81590.1-Nc     | Q | A | T | S | L | Q | N | V | E | L | - | - | R | A | A | P | - | - | G | S | S | Q | I | G | L | Y | A | E | N | G | - | S | G | G | G | I | S | D | V | T | F | T | G | G | I | G | L | K | G | - | G | E | Q | Q | F | T | A | Q | R | L | K | F | N | G | C | T | V   | G | I | Q | V | I | W | D | W | G | W | V | K | S | I | T | M | N | N | V | K | T | G | F | K |   |   |
| 24. OAQ59871.1-Pe     | Q | A | V | T | L | S | F | N | D | F | R | M | A | K | S | S | H | Q | G | V | V | F | N | G | T | T | G | G | G | G | S | A | T | F | M | G | D | L | S | F | T | G | G | A | V | G | I | R | M | - | N | N | Q | Q | Y | A | I | R | A | V | E | F | K | D | V | K | T   | G | I | Q | I | D | H | V | F | T | L | S | L | O | G | L | F | O | N | C | D | V | G | V | N |   |   |
| 25. XP_013940496.1-Ta | Q | A | V | T | L | S | F | N | H | M | K | M | A | E | S | L | H | Q | G | V | V | F | N | G | T | T | G | G | G | G | S | A | T | F | M | G | D | L | E | F | T | G | G | N | I | G | I | R | L | - | N | N | Q | Q | Y | A | M | R | A | L | T | F | N | N | V | K | T</ |   |   |   |   |   |   |   |   |   |   |   |   |   |   |   |   |   |   |   |   |   |   |   |   |   |   |



|                       |   |   |   |   |   |   |   |   |   |   |   |   |   |   |   |   |   |   |   |   |   |   |   |   |   |   |   |   |   |   |   |   |   |   |   |   |   |   |   |   |   |   |   |   |   |   |   |   |   |   |   |   |   |   |   |   |   |   |   |   |   |   |   |   |   |   |   |   |   |   |   |   |   |   |   |   |   |   |   |   |   |   |   |   |   |   |   |   |   |   |   |   |   |   |
|-----------------------|---|---|---|---|---|---|---|---|---|---|---|---|---|---|---|---|---|---|---|---|---|---|---|---|---|---|---|---|---|---|---|---|---|---|---|---|---|---|---|---|---|---|---|---|---|---|---|---|---|---|---|---|---|---|---|---|---|---|---|---|---|---|---|---|---|---|---|---|---|---|---|---|---|---|---|---|---|---|---|---|---|---|---|---|---|---|---|---|---|---|---|---|---|---|
| 1. KKP02807.1-Th      | G | T | R | P | S | A | L | A | P | - | G | R | Y | P | Y | V | A | P | P | T | Y | G | D | L | P | I | S | S | F | L | N | V | K | D | N | G | V | L | G | D | N | T | I | D | E | S | G | T | L | N | A | I | L | E | L | A | A | S | Q | N | K | V | A | Y | F | P | F | G | K | Y | R | V | D | S | T | L | F | I | P | K | G | S | R | I | V | G | E | A | W | A | T | I | T |   |
| 2. EFY84429.1-Ma      | P | K | P | A | A | L | T | D | S | T | S | K | I | V | T | K | S | K | P | Q | Y | E | T | V | P | A | S | K | F | I | S | V | K | S | O | G | A | I | G | D | G | K | T | D | D | T | A | A | F | Q | K | V | F | K | N | V | R | - | R | G | E | I | V | Y | I | D | H | G | V | Y | V | I | T | D | T | V | K | V | P | R | D | C | K | I | V | G | E | A | W | P | L | I | L |   |
| 3. XP_007825860.1-Mr  | P | K | P | A | A | L | T | D | S | T | G | K | I | V | T | K | S | K | P | Q | Y | E | T | V | P | A | S | K | F | I | S | V | K | S | O | G | A | K | G | D | G | K | T | D | D | T | A | A | F | Q | K | V | F | K | N | V | R | - | S | D | E | I | V | Y | I | D | H | G | V | Y | V | I | K | D | T | V | R | V | P | K | D | V | K | I | V | G | E | A | W | P | L | I | L |   |
| 4. EJP66720.1-Bb      | T | K | P | D | A | L | D | S | S | G | N | I | F | T | R | P | K | P | Q | Y | N | V | D | V | S | K | F | V | S | V | K | S | K | G | A | K | G | D | G | V | T | D | D | T | A | A | I | Q | A | A | F | D | S | I | G | - | G | D | Q | I | V | Y | F | D | H | G | N | Y | V | V | T | D | T | V | K | V | P | K | N | V | K | V | G | E | I | W | P | V | I | F |   |   |   |   |
| 5. EGX94485.1-Cm      | T | K | P | A | A | L | D | S | A | G | N | I | F | T | K | S | K | P | Q | Y | N | V | D | A | S | K | F | V | S | V | K | S | K | G | A | K | G | D | G | V | S | D | D | T | A | A | I | Q | A | V | F | N | S | I | G | - | S | D | Q | I | V | Y | F | D | H | G | N | Y | V | V | T | N | T | V | K | V | P | K | D | V | K | I | V | G | E | I | W | P | I | I | F |   |   |   |
| 6. XP_013940488.1-Ta  | G | K | P | A | A | L | T | - | T | G | G | K | V | F | T | K | S | K | P | Q | Y | E | T | V | A | A | G | N | F | V | S | V | K | A | H | G | A | K | G | D | G | S | T | D | D | T | A | A | I | Q | A | I | F | N | S | A | T | - | S | G | Q | V | V | Y | F | D | H | G | A | Y | V | I | T | D | T | I | K | V | P | A | N | I | K | I | V | G | E | I | W | P | L | I | M |   |
| 7. ETS01369.1-Tr      | S | K | P | A | A | L | T | - | S | G | G | K | F | A | T | H | T | R | P | Q | Y | E | T | V | P | A | S | S | F | V | S | I | K | S | R | G | A | K | G | D | G | S | T | D | D | T | A | A | I | Q | A | V | F | N | S | V | S | - | S | G | Q | I | V | Y | F | D | H | G | A | Y | V | I | T | D | T | I | K | V | P | K | N | I | K | I | V | G | E | I | W | P | L | I | M |   |
| 8. XP_013949563.1-Tv  | S | K | P | A | A | L | T | - | A | G | G | K | V | F | T | R | S | R | P | Q | Y | E | N | V | P | A | S | S | F | V | S | V | K | S | R | G | A | K | G | D | G | S | T | D | D | T | A | A | I | Q | A | V | F | N | S | V | T | - | S | G | Q | I | V | Y | F | D | H | G | A | Y | V | T | D | T | I | K | V | P | K | N | I | K | I | V | G | E | V | W | A | L | I | M |   |   |
| 9. KKP03210.1-Th      | S | K | P | A | A | L | T | - | A | G | G | K | V | F | T | R | S | K | P | Q | Y | E | N | V | P | A | S | S | F | V | S | V | K | S | R | G | A | K | G | D | G | S | T | D | D | T | A | A | I | Q | A | V | F | N | S | V | S | - | S | G | Q | I | V | Y | F | D | H | G | A | Y | V | T | D | T | I | K | V | P | K | N | I | K | I | V | G | E | V | W | A | L | I | M |   |   |
| 10. KHE80146.1-Nc     | K | K | P | D | V | L | D | S | N | G | R | V | F | T | R | S | R | P | Q | Y | E | N | V | P | A | S | S | F | L | S | V | K | A | A | G | A | K | G | D | G | K | T | D | D | S | D | A | I | Q | A | V | L | D | K | A | T | - | Q | D | Q | V | V | Y | F | D | H | G | A | Y | L | I | T | K | T | I | K | V | P | K | N | V | R | I | T | G | E | I | W | P | M | I | L |   |   |
| 11. KHE84528.1-Nc     | P | Q | P | T | T | L | K | Q | D | G | - | K | F | Y | E | R | S | K | P | Q | Y | E | T | Y | P | T | W | A | F | L | S | A | R | S | Y | G | A | A | G | D | G | V | T | D | D | T | A | A | L | N | H | L | F | Q | T | A | G | H | T | G | S | V | A | Y | L | D | A | G | Y | K | V | T | D | T | V | H | I | P | G | G | V | R | V | G | E | A | M | A | V | I | L |   |   |   |
| 12. KHE80315.1-Nc     | A | R | P | A | S | L | L | T | S | D | G | R | Y | Y | A | R | S | K | P | L | Y | S | E | L | P | A | S | S | F | L | S | A | R | S | F | G | A | V | G | N | G | T | D | D | A | E | A | L | N | L | F | A | A | A | A | E | Q | G | K | V | A | Y | I | D | H | Q | Y | I | V | R | S | T | V | F | I | P | P | G | T | R | I | T | G | E | S | Y | P | Q | I | V |   |   |   |   |
| 13. XP_013957114.1-Tv | P | R | P | S | S | L | T | V | R | N | G | A | F | Y | T | R | S | K | P | L | Y | A | D | L | D | V | S | S | F | L | S | A | R | D | L | G | A | K | G | D | A | V | T | D | D | T | K | A | L | N | A | A | I | A | T | A | V | R | Q | G | K | V | L | F | V | D | G | G | I | Y | K | V | T | S | T | I | R | I | P | P | G | A | R | I | V | G | E | A | Y | S | N | I | M |   |
| 14. KKP01538.1-Th     | P | R | P | S | S | L | T | I | G | S | G | F | Y | T | R | S | K | P | L | Y | A | N | L | D | V | S | D | F | L | S | A | R | D | L | G | A | K | G | D | A | V | T | D | D | T | K | A | L | N | A | A | I | A | T | A | V | R | Q | G | K | V | L | F | V | D | G | G | I | Y | K | V | T | S | T | I | R | I | P | P | G | A | R | I | V | G | E | A | F | S | N | I | M |   |   |
| 15. KHE89051.1-Nc     | P | R | P | V | S | L | L | A | S | N | G | R | Y | Y | T | R | S | K | P | Q | Y | E | T | L | P | L | S | S | Q | F | I | S | A | R | A | S | G | A | K | G | D | A | A | T | D | D | T | A | A | L | Q | N | A | I | N | T | A | V | A | Q | G | K | V | L | Y | L | D | Y | G | L | Y | R | V | T | S | T | I | R | I | P | P | G | A | K | I | V | G | E | S | Y | A | T | I | M |
| 16. KKP04907.1-Th     | A | R | P | S | S | L | L | S | G | S | - | K | Y | Y | T | R | S | K | P | Q | Y | E | T | L | P | V | S | S | F | O | S | V | R | S | A | G | A | T | G | N | A | V | T | D | D | T | A | A | L | Q | N | I | N | S | A | T | A | A | G | Q | I | V | Y | F | D | A | G | I | Y | R | V | T | S | T | L | K | I | P | P | G | A | K | L | V | G | E | Y | P | I | I | L |   |   |   |
| 17. XP_013953582.1-Tv | S | R | P | A | S | L | L | S | G | S | - | K | Y | Y | T | R | S | K | P | Q | Y | E | T | L | P | V | S | S | F | R | S | V | R | S | A | G | A | T | G | N | A | V | T | D | D | T | A | A | L | Q | N | I | N | S | A | T | A | A | G | Q | V | V | Y | F | D | A | G | I | Y | R | I | T | K | T | L | S | I | P | P | G | A | K | L | V | G | E | Y | P | I | I | M |   |   |   |
| 18. XP_013940791.1-Ta | S | R | P | S | S | L | L | S | G | S | - | K | Y | Y | T | R | S | K | P | Q | Y | E | T | L | P | V | S | S | F | K | S | V | R | S | A | G | A | T | G | N | A | V | T | D | D | T | A | A | L | Q | N | I | N | S | A | T | A | A | G | Q | V | V | Y | F | D | A | G | I | Y | R | I | T | S | T | L | T | I | P | P | G | A | K | I | V | G | E | Y | P | I | I | M |   |   |   |
| 19. KKP00524.1-Th     | A | K | A | K | G | L | D | S | K | G | F | L | Y | R | E | R | P | Q | Y | E | K | S | A | G | S | F | L | V | A | T | D | G | C | K | N | D | G | S | G | D | Q | Q | S | C | I | N | S | F | L | O | K | A | V | S | G | G | K | I | A | Y | F | F | A | G | I | Y | T | V | G | G | T | I | V | I | P | T | G | S | K | V | Q | S | Q | I | Q |   |   |   |   |   |   |   |   |   |
| 20. EGX89976.1-Cm     | E | A | L | T | G | V | Q | N | M | K | P | L | F | T | R | R | R | P | K | Y | G | V | P | A | A | K | S | V | M | N | V | R | A | L | G | A | K | G | D | G | T | D | D | T | A | V | L | N | A | I | L | S | G | A | A | N | T | S | S | V | Y | F | F | G | V | Y | I | V | R | D | T | L | R | V | I | G | S | R | I | I | G | O | V | S | Q | I | M |   |   |   |   |   |   |   |
| 21. XP_013957382.1-Tv | G | G | L | T | G | A | S | N | P | K | L | P | Y | F | S | R | E | K | P | L | Y | V | G | - | A | T | - | - | I | V | Q | M | K | - | W | H | A | K | G | D | G | V | T | D | D | T | A | A | F | Q | V | I | N | Q | Y | A | G | G | T | - | V | I | F | I | D | A | G | S | Y | L | T | D | T | I | P | S | G | T | K | I | V | G | O | C | W | S | Q | L | V |   |   |   |   |   |
| 22. EJP61727.1-Bb     | R | R | V | S | K | L | L | D | S | N | G | N | Y | F | E | R | A | R | P | Q | Y | E | R | S | P | A | S | A | F | I | H | T | K | D | L | G | C | Q | G | D | L | T | D | D | T | A | A | F | Q | A | A | L | - | - | Y | A | S | G | N | - | I | L | F | I | D | A | G | T | Y | I | L | T | S | T | V | I | P | P | G | S | K | I | V | G | E | T | W | S | Q | L | A |   |   |   |
| 23. KHE81590.1-Nc     | R | R | H | S | T | L | L | D | P | Q | N | G | N | Y | F | E | R | P | Q | Y | E | R | D | Q | A | T | S | M | F | M | H | T | K | D | L | G | C | K | G | D | G | T | D | D | T | A | A | F | Q | A | A | L | - | - | Y | A | S | G | K | - | I | L | F | V | D | A | G | S | Y | L | T | S | T | I | T | I | P | P | G | A | K | I | V | G | E | A | W | S | Q | L | V |   |   |   |
| 24. OAQ59871.1-Pc     | S | R | S | O | I | L | L | D | H | S | G | D | Y | W | T | K | S | R | P | Q | Y | E | R | Y | S | S | C | F | A | S | V | K | D | F | G | A | R | G | D | G | K | T | D | D | T | K | A | I | I | A | A | L | K | A | N | V | - | N | R | R | I | T | Y | F | F | A | G | N | Y | R | V | S | D | T | V | L | V | P | A | G | S | R | L | V | G | E | A | W | S | T | L | S |   |   |
| 25. XP_013940496.1-Ta | S | R | P | Q | A | L | V | D | S | S | G | A | Y | W | T | K | S | R | P | Q | Y | E | Q | Y | S | S | G | C | F | S | S | V | R | D | F | G | A | T | G | D | G | K | T | D | A | T | K | A | I | N | A | A | L | K | A | N | A | - | N | R | R | I | T | Y | F | F | A | G | N | Y | R | V | S | G | T | I | H | V | P | V | G | S | R | I | V | G | E | V | W | S | T | I | S |   |
| 26. XP_013954419.1-Tv | S | R | P | Q |   |   |   |   |   |   |   |   |   |   |   |   |   |   |   |   |   |   |   |   |   |   |   |   |   |   |   |   |   |   |   |   |   |   |   |   |   |   |   |   |   |   |   |   |   |   |   |   |   |   |   |   |   |   |   |   |   |   |   |   |   |   |   |   |   |   |   |   |   |   |   |   |   |   |   |   |   |   |   |   |   |   |   |   |   |   |   |   |   |   |

|                       |   |   |   |   |   |   |   |   |   |   |   |   |   |   |   |   |   |   |   |   |   |   |   |   |   |   |   |   |   |   |   |   |   |   |   |   |   |   |   |   |   |   |   |   |   |   |   |   |   |   |   |   |   |   |   |   |   |   |   |   |   |   |   |   |   |   |   |   |   |   |   |   |   |   |   |   |   |   |   |   |   |   |   |     |   |   |   |   |   |   |   |   |   |   |
|-----------------------|---|---|---|---|---|---|---|---|---|---|---|---|---|---|---|---|---|---|---|---|---|---|---|---|---|---|---|---|---|---|---|---|---|---|---|---|---|---|---|---|---|---|---|---|---|---|---|---|---|---|---|---|---|---|---|---|---|---|---|---|---|---|---|---|---|---|---|---|---|---|---|---|---|---|---|---|---|---|---|---|---|---|---|-----|---|---|---|---|---|---|---|---|---|---|
| 1. KKP02807.1-Th      | G | N | G | N | F | - | F | K | N | E | N | S | P | Q | P | V | V | S | V | G | R | A | G | D | V | G | I | A | Q | I | Q | D | V | R | I | T | V | N | D | V | L | P | G | A | I | L | L | Q | F | N | M | A | G | N | N | P | G | D | V | A | L | W | N | S | L | V | T | V | G | G | T | R | G | A | S | A | L | A | N | A | C | T | S | S   | S | N | E | - | C | K | G | A | F |   |
| 2. EFY84429.1-Ma      | A | G | G | C | K | N | F | A | D | E | S | K | P | K | P | V | V | F | Q | V | G | Q | P | G | E | T | G | N | I | E | M | Q | D | L | V | F | A | T | K | G | P | Q | P | G | A | I | L | M | E | V | N | V | A | G | E | S | Q | G | S | V | G | L | W | D | V | H | F | R | V | A | G | A | T | G | T | K | L | Q | S | D | K | C | S | K   | K | P | N | P | Q | C | V | G | S | F |
| 3. XP_007825860.1-Mr  | A | G | G | C | K | N | F | A | D | E | S | K | P | K | P | V | V | F | Q | V | G | Q | P | G | E | T | G | N | I | E | M | Q | D | L | V | F | A | T | K | G | P | Q | P | G | A | I | L | M | E | V | N | V | A | G | E | S | Q | G | S | V | G | L | W | D | V | H | F | R | V | A | G | A | T | G | T | K | L | Q | S | D | K | C | S | K   | K | P | N | P | Q | C | V | G | S | F |
| 4. EJP66720.1-Bb      | A | G | G | N | S | N | F | O | D | Q | S | N | P | K | P | V | V | F | Q | V | G | N | P | G | D | V | G | T | V | E | M | O | D | I | I | F | S | T | M | G | P | Q | P | G | A | I | L | M | E | F | N | V | A | G | O | D | K | G | A | A | G | L | D | L | H | F | R | V | G | G | F | E | G | T | K | L | Q | S | N | Q | C | S | K | N   | P | K | S | E | C | I | G | A | F |   |
| 5. EGX94485.1-Cm      | A | G | G | N | S | N | F | O | D | Q | S | N | P | K | P | V | V | F | Q | V | G | N | P | G | D | V | G | T | V | E | M | O | D | I | I | F | S | T | M | G | P | Q | P | G | A | I | L | M | E | F | N | V | A | G | O | D | K | G | A | A | G | L | D | L | H | F | R | V | G | G | F | E | G | T | K | L | Q | S | N | Q | C | S | K | N   | P | K | S | E | C | I | G | A | F |   |
| 6. XP_013940488.1-Ta  | V | G | G | S | K | - | F | K | D | M | N | N | P | K | P | V | V | Q | V | I | G | Q | P | G | D | T | G | N | V | E | I | Q | D | L | M | F | E | T | I | G | P | Q | P | G | A | I | I | V | E | N | V | A | G | A | S | Q | G | A | G | L | W | D | V | H | W | R | I | G | G | S | A | G | T | Q | L | Q | S | N | T | C | T | K | T | P   | N | S | A | C | F | G | A | F |   |   |
| 7. ETS01369.1-Tr      | V | G | G | S | K | - | F | K | D | Q | N | N | P | Q | V | V | W | Q | V | G | Q | P | G | D | V | G | T | V | E | I | Q | D | L | M | F | E | T | I | G | P | Q | P | G | A | I | I | V | E | N | V | A | G | A | S | Q | G | A | G | L | W | D | V | H | W | R | I | G | G | T | A | G | T | Q | M | Q | S | D | R | C | V | K | T | P | N   | S | A | C | F | G | A | F |   |   |   |
| 8. XP_013949563.1-Tv  | V | G | G | T | K | - | F | K | D | I | N | N | P | Q | V | V | W | Q | V | G | Q | P | G | D | V | G | N | V | E | I | Q | D | I | M | F | E | T | I | G | P | Q | P | G | A | I | I | V | E | N | V | A | G | A | S | Q | G | A | A | G | L | W | D | V | H | W | R | I | G | G | T | A | G | T | Q | L | Q | S | D | R | C | V | K | T | P   | N | S | A | C | F | G | A | F |   |   |
| 9. KKP03210.1-Th      | V | G | G | T | K | - | F | K | D | I | N | N | P | Q | V | V | W | Q | V | G | Q | P | G | D | V | G | N | V | E | I | Q | D | I | M | F | E | T | I | G | P | Q | P | G | A | I | I | V | E | N | V | A | G | A | S | Q | G | A | A | G | L | W | D | V | H | W | R | I | G | G | S | A | G | T | Q | L | Q | S | D | R | C | V | K | T | P   | N | S | A | C | F | G | A | F |   |   |
| 10. KHE80146.1-Nc     | A | G | G | D | S | F | - | F | K | D | Q | K | N | P | K | P | L | F | Q | V | G | Q | P | G | D | T | G | V | E | M | S | D | L | I | F | G | T | A | G | P | Q | P | G | A | I | L | I | E | N | V | A | G | T | K | Q | G | D | A | G | L | W | D | V | H | A | R | I | G | G | Y | A | G | T | D | L | Q | L | O | K | C | G | K | N | P   | P | E | D | C | F | G | S | F |   |   |
| 11. KHE84528.1-Nc     | G | A | G | P | K | - | F | S | D | I | N | N | P | Q | P | V | L | Q | I | G | N | M | G | E | A | G | Y | V | E | V | S | D | I | I | V | S | T | Q | G | T | A | G | A | V | L | I | Q | Y | N | L | N | S | A | G | S | S | P | S | G | L | W | D | V | H | T | R | I | G | G | F | A | G | S | N | L | Q | L | T | D | C | P | K | T | P   | D | V | N | C | I | A | A | M |   |   |
| 12. KHE80315.1-Nc     | S | A | G | P | V | - | F | N | D | M | A | N | P | Q | P | V | V | Q | I | G | I | A | G | Q | P | G | S | I | E | N | S | D | T | I | V | S | T | R | Q | Q | A | G | A | I | G | I | Q | Y | N | L | A | S | A | G | S | G | P | S | G | M | W | D | V | H | V | R | I | G | G | F | M | G | S | E | L | Q | L | E | Q | C | A | K | T | P   | D | P | N | C | I | A | A | F |   |   |
| 13. XP_013957114.1-Tv | G | S | G | P | F | - | F | S | K | A | S | S | P | Q | P | V | V | Q | V | G | L | P | G | Q | F | G | Q | I | E | W | S | N | M | V | S | T | Q | S | T | S | G | A | I | V | I | E | Y | N | L | A | S | T | A | S | N | P | S | G | M | W | D | V | H | V | R | I | G | G | F | E | G | S | N | L | Q | L | A | N | C | P | Q | N | I | N   | P | N | C | I | A | A | H |   |   |   |
| 14. KKP01538.1-Th     | G | S | G | P | F | - | F | S | K | A | S | A | P | Q | P | V | V | Q | V | G | L | P | G | Q | F | G | Q | I | E | W | S | N | M | V | S | T | Q | S | T | S | G | A | I | V | I | E | Y | N | L | A | S | T | A | S | N | P | S | G | M | W | D | V | H | V | R | I | G | G | F | K | G | S | N | L | Q | L | A | N | C | P | Q | N | I | N   | P | N | C | I | A | A | H |   |   |   |
| 15. KHE89051.1-Nc     | S | A | G | G | F | - | F | N | D | I | N | N | P | K | P | V | L | Q | V | G | S | S | G | Q | A | G | T | V | E | L | S | D | I | I | V | S | T | Q | N | A | Q | A | G | A | V | L | I | E | W | N | L | A | S | P | A | S | N | P | S | G | M | W | D | V | H | T | R | I | G | G | F | V | G | S | Q | Q | V | G | Q | C | L | K | T | P   | R | R | E | C | I | V | A | F |   |   |
| 16. KKP04907.1-Th     | S | S | G | S | F | - | F | N | D | Q | N | N | P | K | P | V | V | Q | V | G | T | P | G | Q | T | G | Q | V | E | S | D | M | I | V | A | T | Q | G | T | Q | A | G | A | V | L | I | E | W | N | L | A | T | S | G | T | - | P | S | G | M | W | D | V | H | T | R | I | G | G | F | K | G | S | N | L | Q | L | A | Q | C | P | V | T | A   | N | T | A | C | I | G | A | Y |   |   |
| 17. XP_013953582.1-Tv | S | S | G | S | F | - | F | N | D | Q | N | N | P | K | P | V | V | Q | V | G | T | P | G | Q | S | G | Q | V | E | S | D | M | I | V | A | T | Q | G | T | Q | A | G | A | V | L | I | E | W | N | L | A | T | S | G | T | - | P | S | G | M | W | D | V | H | T | R | I | G | G | F | K | G | S | N | L | Q | L | A | Q | C | P | V | T | A   | N | T | A | C | I | G | A | Y |   |   |
| 18. XP_013940791.1-Ta | S | S | G | S | F | - | F | N | D | Q | N | N | P | K | P | V | V | Q | V | G | T | P | G | Q | T | G | Q | V | E | S | D | M | I | V | A | T | Q | G | T | Q | A | G | A | V | L | I | E | W | N | L | A | T | S | G | T | - | P | S | G | M | W | D | V | H | T | R | I | G | G | F | K | G | S | N | L | Q | L | A | Q | C | P | V | T | A   | N | T | A | C | I | G | A | Y |   |   |
| 19. KKP00524.1-Th     | G | S | G | F | Y | - | F | S | D | M | H | D | P | K | V | M | I | Q | V | G | H | E | G | D | V | G | T | M | E | I | V | E | M | L | F | S | V | K | N | T | A | G | A | I | L | M | E | W | N | T | A | A | S | D | Q | G | A | A | G | M | D | S | H | F | R | V | G | G | A | L | G | S | D | L | D | L | A | T | C | P | K | F | S | N   | P | E | C | I | A | A | S |   |   |   |
| 20. EGX89976.1-Cm     | G | T | G | A | N | - | F | E | D | E | L | K | P | R | P | V | V | Q | V | G | P | T | D | P | P | G | I | I | E | I | Q | D | M | M | F | T | V | S | G | T | A | G | A | V | L | M | E | W | N | T | A | A | S | D | Q | G | A | A | G | M | D | S | H | F | R | V | G | G | A | I | G | S | K | L | Q | E | E | T | C | A | K | K | S | N   | P | E | C | K | A | A | S |   |   |   |
| 21. XP_013957382.1-Tv | A | S | G | T | K | - | F | O | D | A | S | N | P | H | A | L | F | R | V | G | E | G | E | T | G | N | V | E | I | Q | D | L | L | F | T | T | K | G | P | T | A | G | L | V | A | V | E | W | N | M | N | A | D | G | O | G | T | A | A | M | W | D | S | H | V | R | I | G | G | A | D | G | T | D | L | S | V | A | D | C | P | A | V | T   | D | Q | K | C | T | A | G | A |   |   |
| 22. EJP61727.1-Bb     | A | S | G | P | Y | - | F | S | D | A | N | N | P | K | V | M | I | Q | V | G | A | G | Q | I | G | N | V | E | M | O | D | L | L | F | T | T | H | G | P | T | S | G | A | I | L | V | Q | W | N | L | R | A | E | S | Q | G | A | A | G | L | W | D | C | H | A | R | V | G | G | A | L | G | T | K | L | T | P | V | E | C | P | A | A | T   | D | P | G | C | S | A | A | S |   |   |
| 23. KHE81590.1-Nc     | A | S | G | S | Y | - | F | S | D | A | S | N | P | K | V | L | I | K | V | N | A | G | D | I | G | N | V | E | M | O | D | L | L | F | T | T | R | G | A | T | A | G | L | V | I | Q | W | N | I | Q | A | A | T | Q | G | S | A | G | L | W | D | C | H | V | R | I | G | G | A | T | G | T | K | L | T | P | A | E | C | P | V | T | A | N   | T | A | C | I | G | A | Y |   |   |   |
| 24. OAQ59871.1-Pe     | A | I | G | D | K | - | F | A | D | E | S | N | P | R | V | M | F | Q | M | G | K | K | G | K | G | I | I | E | V | T | D | L | A | F | D | V | A | D | V | L | P | G | T | I | L | V | E | N | N | I | S | G | C | K | P | G | D | V | G | L | W | D | S | H | F | R | A | G | G | T | I | G | S | A | V | E | T | - | K | C | A | S | Y | P   | I | P | N | C | K | A | A | F |   |   |
| 25. XP_013940496.1-Ta | A | Y | G | K | A | - | F | E | D | E | K | N | P | Q | V | V | F | K | M | G | D | T | G | S | R | G | I | I | E | V | S | D | I | A | F | D | V | A | D | V | L | P | G | A | I | L | V | E | N | N | A | A | G | F | R | P | G | D | V | G | L | W | D | S | H | F | R | A | G | G | T | I | G | S | A | V | E | T | - | K | C | R | S | Y</ |   |   |   |   |   |   |   |   |   |   |

|                       |   |   |   |   |   |   |   |   |   |   |   |   |   |   |   |   |   |   |   |   |   |   |   |   |   |   |   |   |   |   |   |   |   |   |   |   |   |   |   |   |   |   |   |   |   |   |   |   |   |   |   |   |   |   |   |   |   |   |   |   |   |   |   |   |   |   |   |   |   |   |   |   |   |   |   |   |   |   |   |   |   |   |   |   |   |   |   |   |   |   |   |   |   |   |
|-----------------------|---|---|---|---|---|---|---|---|---|---|---|---|---|---|---|---|---|---|---|---|---|---|---|---|---|---|---|---|---|---|---|---|---|---|---|---|---|---|---|---|---|---|---|---|---|---|---|---|---|---|---|---|---|---|---|---|---|---|---|---|---|---|---|---|---|---|---|---|---|---|---|---|---|---|---|---|---|---|---|---|---|---|---|---|---|---|---|---|---|---|---|---|---|---|
| 1. KKP02807.1-Th      | V | G | I | H | V | A | K | G | S | S | - | P | Y | I | Q | N | V | W | N | W | V | A | D | H | I | A | E | F | N | - | G | G | N | G | H | S | I | A | G | K | G | G | I | L | V | Q | S | K | A | T | W | L | Y | A | I | G | S | E | H | W | L | Y | Q | L | N | L | H | N | A | A | N | V | V | V | S | L | L | Q | A | E | T | N | Y | D | Q | G | A | N | T | Q | Q | L |   |   |
| 2. EFY84429.1-Ma      | M | L | V | H | V | T | P | S | A | S | - | A | Y | F | E | N | T | W | F | W | V | A | D | H | E | L | D | P | - | D | H | - | N | Q | I | N | I | Y | N | G | R | G | V | L | I | E | S | K | G | L | W | L | W | G | T | A | S | E | H | N | Q | L | Y | N | Y | Q | L | T | N | A | E | N | V | Y | M | S | L | I | Q | T | E | T | A | Y | M | Q | G | N | P | D | A | R | V |   |
| 3. XP_007825860.1-Mr  | M | L | V | H | V | T | R | D | A | S | - | A | Y | F | E | N | T | W | F | W | V | A | D | H | E | L | D | P | - | D | H | - | N | Q | I | N | I | Y | N | G | R | G | V | L | I | E | S | K | G | L | W | L | W | G | T | A | S | E | H | N | Q | L | Y | N | Y | Q | L | T | N | A | E | N | V | Y | M | S | L | I | Q | T | E | T | A | Y | M | Q | G | N | P | D | A | R | V |   |
| 4. EJP66720.1-Bb      | M | L | M | H | I | T | S | O | A | S | - | A | Y | L | E | N | T | W | F | W | V | A | D | H | E | L | D | G | - | D | H | - | N | Q | I | N | I | Y | N | G | R | G | I | L | I | E | S | K | G | A | W | L | W | G | T | S | S | E | H | S | V | L | S | N | Y | Q | L | T | K | A | K | N | V | Y | M | G | L | I | Q | T | E | T | A | Y | M | Q | G | N | P | D | A | K | V |   |
| 5. EGX94485.1-Cm      | M | L | M | H | V | T | A | E | A | S | - | V | Y | L | E | N | T | W | Y | W | V | A | D | H | E | L | D | G | - | D | H | - | N | Q | I | N | I | Y | N | G | R | G | I | L | I | E | S | K | G | A | W | L | W | G | T | S | S | E | H | S | V | L | S | N | Y | Q | L | T | K | A | K | N | V | Y | M | G | L | I | Q | T | E | T | A | Y | M | Q | G | N | P | D | A | K | V |   |
| 6. XP_013940488.1-Ta  | L | L | L | H | V | T | S | S | A | S | - | I | Y | M | E | N | A | W | L | W | V | A | D | H | E | L | D | S | - | D | H | - | N | Q | I | N | I | Y | N | G | R | G | L | L | I | E | S | K | G | A | W | L | W | G | T | A | S | E | H | N | Q | L | Y | N | Y | F | N | S | A | Q | N | V | Y | S | I | L | Q | T | E | T | A | Y | M | Q | G | N | P | D | A | R | V |   |   |   |
| 7. ETS801369.1-Tr     | L | L | L | H | V | T | S | S | G | S | - | I | Y | M | E | N | T | W | L | W | V | A | D | H | E | L | D | A | - | D | H | - | S | Q | I | N | I | Y | N | G | R | G | L | L | I | E | S | K | G | T | W | L | W | G | T | A | S | E | H | N | V | L | Y | N | Y | A | F | N | N | A | Q | N | V | Y | S | N | I | L | Q | T | E | T | A | Y | M | Q | G | N | P | D | A | R | V |   |
| 8. XP_013949563.1-Tv  | L | L | L | H | V | T | S | S | G | S | - | I | Y | M | E | N | N | W | L | W | V | A | D | H | E | L | D | A | - | D | H | - | S | Q | I | N | I | Y | N | G | R | G | L | L | I | E | S | K | G | T | W | L | W | G | T | A | S | E | H | S | V | L | Y | N | Y | A | L | N | G | A | Q | N | V | Y | A | N | I | L | Q | T | E | T | A | Y | M | Q | G | N | P | D | A | R | V |   |
| 9. KKP03210.1-Th      | L | L | L | H | V | T | S | S | G | S | - | I | Y | M | E | N | T | W | L | W | V | A | D | H | E | L | D | A | - | D | H | - | S | Q | V | N | I | Y | N | G | R | G | L | L | I | E | S | K | G | T | W | L | W | G | T | A | S | E | H | S | V | L | Y | N | Y | A | L | N | N | A | Q | N | V | Y | A | N | I | L | Q | T | E | T | A | Y | M | Q | G | N | P | D | A | R | V |   |
| 10. KHE80146.1-Nc     | M | M | L | H | V | P | T | K | G | S | - | V | Y | L | E | N | T | W | F | W | V | A | D | H | D | L | E | A | - | D | N | - | K | Q | I | D | I | F | N | G | R | G | V | L | I | E | G | G | P | Y | W | G | W | G | T | A | S | E | H | S | V | L | Y | N | Y | Q | F | S | N | A | S | N | V | Y | L | G | L | I | Q | T | E | T | P | Y | F | Q | G | N | P | I | S | T | K |   |
| 11. KHE84528.1-Nc     | L | S | F | H | V | T | K | G | A | G | - | L | Y | M | E | N | N | W | F | W | V | A | D | H | D | I | E | F | - | N | N | - | T | Q | I | S | I | F | A | G | R | G | V | L | I | E | E | R | - | V | W | L | V | G | T | A | S | E | H | H | T | L | Y | Q | Y | L | N | A | T | D | V | F | M | G | Q | A | T | E | T | P | Y | Y | Q | N | P | P | A | P | L |   |   |   |   |   |
| 12. KHE80315.1-Nc     | M | S | M | H | I | T | A | L | S | S | - | G | L | Y | M | E | N | C | W | L | W | V | A | D | H | D | I | E | E | - | A | N | N | S | Q | I | T | V | Y | A | G | R | G | L | L | I | E | S | G | Q | I | W | L | V | G | T | G | V | E | H | H | Q | M | E | Y | Q | L | Y | N | T | N | D | I | E | M | G | Q | I | Q | T | E | T | A | Y | Y | O | P | N | P | D | A | R | Y |   |
| 13. XP_013957114.1-Tv | T | M | M | H | V | T | P | A | A | Q | - | G | L | Y | M | E | N | C | W | L | W | V | A | D | H | D | I | E | P | - | S | L | - | R | M | I | D | V | Y | S | V | R | G | L | L | V | E | S | G | N | I | W | L | W | G | T | A | V | E | H | N | A | L | Y | Q | Y | E | F | S | K | T | Q | N | I | F | M | G | F | I | Q | T | E | T | A | Y | Y | Q | P | H | P | N | A | T | S |
| 14. KKP01538.1-Th     | T | M | M | H | V | T | P | V | A | Q | - | G | L | Y | M | E | N | C | W | L | W | V | A | D | H | D | I | E | P | - | S | L | - | R | M | I | D | V | Y | S | V | R | G | L | L | V | E | S | G | N | I | W | L | W | G | T | A | V | E | H | N | A | L | Y | Q | Y | E | F | S | K | T | Q | N | I | F | M | G | F | I | Q | T | E | T | A | Y | Y | Q | P | H | P | N | A | T | S |
| 15. KHE89051.1-Nc     | M | A | M | H | I | T | K | G | A | S | - | G | L | Y | M | E | N | V | W | L | W | V | A | D | H | D | I | D | A | - | A | N | - | T | Q | I | T | L | Y | S | G | R | G | L | Y | I | E | S | G | T | F | W | L | Y | G | T | G | S | E | H | H | V | L | Y | Q | Y | L | N | S | T | Q | N | I | F | M | G | M | I | Q | T | E | T | P | Y | Y | Q | P | T | P | N | A | L | V |   |
| 16. KKP04907.1-Th     | M | S | M | H | I | T | S | A | S | N | - | L | Y | M | E | N | N | W | L | W | V | A | D | H | D | I | E | A | - | N | N | - | S | Q | I | T | I | F | N | G | R | G | L | Y | V | E | S | G | T | F | W | F | V | G | T | A | V | E | H | H | V | L | Y | Q | Y | F | A | N | T | Q | N | I | Y | A | G | V | I | Q | T | E | T | P | Y | Y | Q | P | N | P | L | A | P | T |   |   |
| 17. XP_013953582.1-Tv | M | S | M | H | V | T | A | G | A | S | - | L | Y | M | E | N | N | W | F | W | V | A | D | H | D | I | E | P | - | S | N | - | T | Q | I | T | I | F | N | G | R | G | L | Y | I | E | S | G | T | F | W | L | V | G | T | A | V | E | H | H | T | L | Y | Q | Y | F | A | N | T | Q | N | I | Y | A | G | V | I | Q | T | E | T | P | Y | Y | Q | P | N | P | N | A | P | T |   |   |
| 18. XP_013940791.1-Ta | M | S | M | H | I | T | A | S | A | S | - | L | Y | L | E | N | N | W | L | W | V | A | D | H | D | I | D | S | - | S | N | - | T | Q | L | T | I | F | S | G | R | G | L | Y | I | E | S | G | T | F | W | F | V | G | T | A | V | E | H | H | T | F | Y | Q | Y | F | A | N | T | Q | N | I | Y | A | G | V | I | Q | T | E | T | P | Y | Y | Q | P | N | P | N | A | P | T |   |   |
| 19. KKP00524.1-Th     | L | M | F | H | V | T | P | O | A | N | - | G | Y | F | E | N | V | W | A | V | A | D | H | D | N | D | P | D | - | S | T | - | I | T | Q | V | A | I | F | G | A | R | G | M | L | I | E | S | G | P | S | W | F | Y | G | S | E | H | S | V | L | Y | Q | Y | L | N | S | G | A | K | N | V | Y | M | G | H | I | Q | T | E | S | P | Y | F | Q | P | V | P | G | A | P | A |   |   |
| 20. EGX89976.1-Cm     | M | L | L | H | L | K | P | S | S | T | - | A | Y | L | E | N | V | W | A | V | A | D | H | D | L | D | P | - | D | - | R | P | Q | I | D | I | Y | V | G | R | G | L | I | Q | S | Q | K | A | W | L | W | G | T | S | E | H | C | A | L | Y | Q | Y | Q | V | S | D | A | S | N | I | L | L | G | M | I | Q | T | E | S | P | Y | Y | Q | P | V | P | A | A | P | Q |   |   |   |   |
| 21. XP_013957382.1-Tv | M | M | F | H | M | T | P | S | A | S | - | A | Y | I | E | N | M | W | L | W | V | A | D | H | D | L | D | - | - | N | - | M | T | Q | I | S | V | Y | V | A | R | G | M | L | I | E | S | K | P | W | L | Y | G | T | A | S | E | H | A | V | F | Y | Q | Y | E | F | Y | Q | A | Q | V | L | A | S | M | I | Q | T | E | T | P | Y | Y | Q | P | N | P | L | P | P | A | P | A |   |
| 22. EJP61727.1-Bb     | L | M | M | H | L | T | K | S | A | S | - | G | Y | F | E | N | M | L | W | V | A | D | H | M | I | D | P | K | - | N | D | - | M | T | Q | T | S | I | Y | V | A | R | G | F | L | I | E | S | K | P | T | C | - | - | T | A | S | E | H | A | V | F | Y | Q | Y | F | H | S | A | A | N | I | F | A | G | M | V | Q | T | E | S | P | Y | F | Q | P | T | P | P | P | P | S |   |   |
| 23. KHE81590.1-Nc     | L | M | M | H | L | T | S | S | A | S | - | G | Y | F | E | N | M | L | W | V | A | D | H | M | I | D | T | N | S | - | M | T | Q | T | S | I | Y | V | A | R | G | F | L | I | E | S | K | P | T | C | - | - | T | A | S | E | H | A | V | F | Y | Q | Y | F | H | S | A | A | N | I | F | A | G | M | V | Q | T | E | S | P | Y | F | Q | P | T | P | P | P | P | S |   |   |   |   |
| 24. OAQ59871.1-Pe     | L | F | L | H | L | R | P | E | S | - | T | Y | M | E | S | V | W | G | W | S | V | N | R | D | L | D | G | A | T | N | G | T | S | Q | S | I | A | V | G | R | G | M | L | V | E | S | R | G | T | W | M | V | G | T | A | F | E | H | F | V | L | Y | Q | Y | F | L | N | A | A | N | V | F | S | S | M | A | Q | T | E | T | V | Y | W | Q | P | A | P | P | A | P | A |   |   |   |
| 25. XP_013940496.1-Ta | L | F | L | H | L | K | S | S | S | - | T | Y | L | E | S | V | W | G | W | S | V | N | R | D | L | D | G | A | T | N | G | T | S | Q | S | V | A | V | G | R | G | L | L | V | E | S | R | G | T |   |   |   |   |   |   |   |   |   |   |   |   |   |   |   |   |   |   |   |   |   |   |   |   |   |   |   |   |   |   |   |   |   |   |   |   |   |   |   |   |   |   |   |   |   |





745

768

1. KKP02807.1-Th I - N T Q N G Y T G G W T P G - G G D V G R Y -  
 2. EFY84429.1-Ma A I K D S D - N R N N F C A A - I A A F E S S -  
 3. XP\_007825860.1-Mr A I Q D S E - N R N N F C A A - I A A F A S S -  
 4. EJP66720.1-Bb A A L D K D - N R N N F C A A - L A S F S P - -  
 5. EGX94485.1-Cm V A L D K D - N R N N F C A A - L A S F S S - -  
 5. XP\_013940488.1-Ta V V F D R D - N R N T F C G T - A I S Y E T S -  
 7. ETS01369.1-Tr A V F D R D - N R N T F C G T - V A S F E T S -  
 8. XP\_013949563.1-Tv S V F D R D - N R N T F C G T - I A S F E T S -  
 9. KKP03210.1-Th S V F D R D - N R N T F C G T - I A S F E T S -  
 10. KHE80146.1-Nc M A E D K D - N R N N F C A T - L A L F Q S S -  
 11. KHE84528.1-Nc R N K T S G - S S G N A A D P W V Q I Y N L N -  
 12. KHE80315.1-Nc I I P A A D - N D G M F V D S - V A Y V H T A -  
 13. XP\_013957114.1-Tv T V F Q K D - N T G P F P Q G - V S L F E S S L -  
 14. KKP01538.1-Th T V F Q K D - N T G P F P Q G - V S L F E S S L -  
 15. KHE89051.1-Nc V A W Y A D - N V N N F P S S - V G V Y K - - -  
 16. KKP04907.1-Th L A A S S A - N A N T F A D V - I A L F R L A -  
 17. XP\_013953582.1-Tv L A I A S A - N V N A F A D I - V A L F R L A -  
 18. XP\_013940791.1-Ta L A T S Q S - N V N G F A D V - I A L F R L A -  
 19. KKP00524.1-Th I L Q S D G - N Q R G Y T T - E V S V W L P L -  
 20. EGX89976.1-Cm V A T L A K D N V N G F L S - S V L A W L E G S -  
 21. XP\_013957382.1-Tv - - - - - - - - - - - - - - - - - -  
 22. EJP61727.1-Bb I P A I D N L N V E V H P K W S Q I S I L D - -  
 23. KHE81590.1-Nc I P A I D N L N V D T H P S W S Q V S I L D - -  
 24. OAQ59871.1-Pe A A V S A D - N K G G W G G L - I A A Y L P P F A -  
 25. XP\_013940496.1-Ta A A L S A D - N K G G W G G L - I A A Y L P P F A -  
 26. XP\_013954419.1-Tv T A F S A D - N K G G W G G L - I A A Y L P P F A -  
 27. KKO97443.1-Th A A L S A D - N K G G W G G L - I A A Y L P P F A -  
 28. ETS02909.1-Tr A A L S A D - N K G G W G G L - I A A Y L P P F A -  
 29. XP\_013952078.1-Tv V A E V V D T A N A G W Q S H - G G V M A A Y -  
 30. ETS04839.1-Tr V A E V V D T A N A G W Q S H - G G V M A A Y -  
 31. XP\_013948340.1-Ta V A E V T D T A N A G W Q S H - G G V M A A Y -  
 32. XP\_013955784.1-Tv F G N G S D G Y G G S W Q T L - I A N I A S Q -  
 33. KKP07835.1-Th F G N S N D G Y G G S W Q T L - I A N I A S Q -  
 34. ETS06856.1-Tr F G N G N D G Y G G S W Q T L - I A N I A S Q -  
 35. XP\_013947491.1-Ta F G N S N D G F G G S W G T L - I A G I N S Q -  
 36. EFY87950.1-Ma V - V A N G S F Y G G W P K - - G S V V G R Y -  
 37. XP\_007825395.1-Mr V - V E H G T F Y G G W P K - - G S V V G R Y -  
 38. XP\_013953704.1-Tv I - N A Q D G F T G G W S P - - G G D V G R Y -  
 39. ETR96848.1-Tr I - N A Q D G F T G G W S P - - G G D V G R Y -  
 40. KKO98539.1-Th I - N A Q P D F T G G W S P - - G S D V G R Y -  
 41. XP\_013947675.1-Ta I - N A Q P D F T G G W S P - - G A D I G R Y -  
 42. EGX87862.1-Cm V - G A E G K F E G G W N P - - G A T I G R Y -  
 43. KHE87975.1-Nc I - V T N E G F T G S W S G S - G G D V G R Y -  
 44. XP\_013938533.1-Ta I - N T Q N G F T G S W G G N - G G D V G R Y -  
 45. ETS00923.1-Tr I - N T A N G F T G S W P G G - G G D V G R Y -  
 46. XP\_013959477.1-Tv I - N T Q N G Y T G S W S P G - G G D V G R Y -  
 47. KKO99433.1-Th V A E V V D T A N A G W Q S H - G G V M A A Y -

AA9

1

95

|                      |                                                                                                                                                                                                   |
|----------------------|---------------------------------------------------------------------------------------------------------------------------------------------------------------------------------------------------|
| 1. KKO97863.1-Th     | - - MK - H C I A F L L L S L A S M A S A H T S F T L F I D R K N Q G D G T C V R T P S D G E T - - - A T N P I H P I T S E D - - I V C G R D G N Q A V S F I C P - A N Q G S L L L F E W          |
| 2. XP_013944427.1-Ta | MA Q K L S N L F A I A L - T V A T G V V G H G H V N N I V N G V Y Y Q G Y D P T S F P Y M P D P - - - P I V V G W T A A A D L D - - N G F V S P D A Y Q T P D I V C H K N G T N A K G H A S V    |
| 3. KKP05760.1-Th     | MA Q K L S N L L A T A L - T V A T G V V G H G H V N N I V N G V Y Y Q G Y D P T S F P Y M S D P - - - P I V I G W T A A A D L D - - N G F V S P D A Y Q S P D I V C H K N A T N A K G H A S V    |
| 4. XP_013953575.1-Tv | M T Q K L T S L L V T A L - T V A T G V I G H G H V N N I V I N G A Y Y Q G Y D P T L F P Y E P N P - - - P I V V G W T A S A D T D - - N G F V A P D A Y Q S P D I I C H R N A T N A R G H A S V |
| 5. OAQ64763.1-Pe     | - - M L E T H H L L L L - A Y A I T A S A H G H I S N V V I N G A Y Y P G Y D S P A W Y G N P N A - - - P N V F G W T I S Q Q D - - N G F V S P D A F G S S D I I C H R E A V P A K S H V Q V     |
| 6. KHE85031.1-Ne     | - - - M A R M S I L T A L - A G A S L V A A H G H V S K V I V N G V E Y Q N Y D P T S F P Y N S N P - - - P T V I G W T I D Q K D - - N G F V S P D A F D S G D I I C H K S A K P A G G H A T V   |
| 7. KHE87501.1-Ne     | M P S F T S K S L L A V L - A G A A S V A A H G H V S N I V I N G E Y Y R G F D - S S L N Y M A N P - - - P A V V G W K A N N Q D - - N G F V G P D A F S S P D I I C H K D A T N A K G H A V V   |
| 8. KHE80150.1-Ne     | - - - M V R A L R L L A S C - A M F S Q A L A H S H I L Y L I I N G Q O Y R G F N P H A P L A I T N S - - - - I G W S T S A V D - D G F V T P S N Y S N P D I I C H R D G K P A K A H A P V       |
| 9. XP_013949120.1-Ta | M K S A A K L T L T A L G C L A G S V L G H G Q V Q N F I N G A Y N Q G F I L D Y Y Y Q K V N T G K F P N V A G W Y A E D L D - L G F I A P D A Y T T P D I I C H K N S A P G A I T A T I         |
| 10. XP_013954128.1-T | - M K S S T T H I L T A L G C L T W G V L G H G Q I Q N F T V N G V Y N Q G F I L D Y Y Y Q K V N T G H F P N V A G W Y A E D L D - L G F V A P D A Y T T P D I V C H K N S A P G A A S A T V     |
| 11. KKO97781.1-Th    | - M K S S - - - V V A A L G C L A G S A L G H G Q I Q N F T V N G A Y N Q G F I L D Y Y Y Q K V N T G H F P N V A G W Y A E D L D - L G F I S P D A Y T T P D I I C H K N A A P G A A T A T A     |
| 12. KNB10101.1-Fo    | - - - - - M H F L Y S L L A T A G L A A A H G Y V E T G T I E T Q T Y Q F Y N P Y T D P Y M N P V - - - P K R I S R P I P G N G P V E D V T S I D M Q C N G Y T A G K G S S P A A L H A D A       |
| 13. KHE85853.1-Ne    | - - - - - M K T F A T L L A S I G L V A A H G F V D N A T I G G - - - Q F Y Q P Y Q D P Y M G S P - - - P D R I S R K I P G N G P V E D V T S L A I Q C N - - - A D - - S A P A K L H A S A       |
| 14. KHE84465.1-Ne    | - - - M R S T T V L A G L A T V L A P L A S A H T V L T T V F V N D K N Q G D G T C V R M P M D G N I - - - A N A P V I N M N S D D - - - M I C G R D G L K K V N Y A I P - A T A G S K M T F E F |
| 15. EFP92676.1-Ma    | - - - - - M K F G V L V L A S A A S A H T L F T T L Y I N G K N Q G D G T C V R M P H D S S T - - - A N G P I Y P I T G D D - - M S C G R D G N N A V A F T C P - A P H N A T L T F K F           |
| 16. XP_011411637.1-M | - - - - - M K F G V L V L A S A A S A H T L F T T L Y I N G K N Q G D G T C V R M P H D S S T - - - A N G P I Y P I T G E D - - M S C G R D G N K A V A Y T C P - A P H N A T L T F K F           |
| 17. OAQ68931.1-Pe    | - - - - - M K F G L L T L A S V A S A H T L F T T L F I N G K N Q G D G T C V R M P R G G S G - - - A T A P I Y P I D G A D - - M A C G R D G N K P V E F T C P - V P H K A T L T V Q F           |
| 18. EJP65452.1-Bb    | - - - - - M K L L H M L V M A S A A T A H T M F T T L Y V D G K N Q G D G T C V R M P M N G A T - - - G T A P I Y P I T G D A - - M A C G Y G G R D P V P F V C P - A A S G A K L T F E F         |
| 19. EGX90755.1-Cm    | - - - - - M L A L A S A A T A H T L F T T L Y I N G K N Q G D G T C V R M P K S G A T - - - G T S P I Y P I T G D A - - M A C G Y G G R D P V P F V C P - A A S G A K L T F E F                   |
| 20. ET803449.1-Tr    | - - M K - L W I G - L L L L G L A C R A S A H T T F T T L F I D K K N Q G D G T C V R M P Y D D K T - - - A T N P V K P I T S S D - - M A C G R N G D P P P F I C S - A K K G S L L T F E F       |
| 21. XP_013941775.1-T | - - M K A Y T N A R L L M L G L A A L A N A H T T F T T L Y V D R K S Q G D G T C V R M P Y D G E T - - - A T F P I K S V V S E D - - M V C G R N G T E P V P F V C P - T K K G S L L T F E F     |
| 22. XP_013957375.1-T | - - M K - R S I A G L L S L G L A S V A S A H T S F T L F I D R K S Q G D G T C V R T P F D G E T - - - A T V P I R P I T S D D - - M V C G R N G T E A V S F I C P - A K K G S L L T F E F       |

96

190

|                      |                                                                                                                                                                                                   |
|----------------------|---------------------------------------------------------------------------------------------------------------------------------------------------------------------------------------------------|
| 1. KKO97863.1-Th     | R Q W P D A Q Q P G S I D P - G H L - G P C A V Y I K K V D D M - F T E - S A A G G G W F K I W E D G Y N P V T Q K W C V D R L V E N N G L - L S V N L P R G L P S G Y Y I V R P E I V A L H     |
| 2. XP_013944427.1-Ta | K A G D S V L F Q W V P V P W P H K - S T V V D Y L A N C N G P - C E T V D K T T L E F F K I D G I G S G G N P G T W G S D V L I G N N N T - W V I Q I P E D L Q T G N Y V L R R H E L I A L H   |
| 3. KKP05760.1-Th     | K A G D S I L L Q W L P L P W P H P - G P I V D Y L A N C N G D - C E T V D K T T L E F F K I D G I G S G G N P G R W A S D V L I G N N N T - W V V Q I P A D L E T G N Y V L R R H E L I A L H   |
| 4. XP_013953575.1-Tv | M A G S S V L I Q W V P I P W P H P - G P V L D Y L A N C N G D - C E T V D K T T L E F F K I D G I G S G G N P G R W A S D V L I G N N N T - W V V Q I P A D L E T G N Y V L R R H E L I A L H   |
| 5. OAQ64763.1-Pe     | A A G D I L T L Q W T P W P D S H H - G P V I D Y L A N C N G P - C E S V D K T T L E F F K I D G V G S Q G S P G T Y A D D V L I S K N N T - W E V K I P A N I A P G N Y V L R R H E I I A L H   |
| 6. KHE85031.1-Ne     | K A G D K I S I Q W D Q W P E S H K - G P V I D Y L A A C D G D - C E S V D K T A L K F F K I D G A G Y D A T N G - W A S D T L I K D G N S - W V V E I P E S I K P G N Y V L R R H E I I A L H   |
| 7. KHE87501.1-Ne     | K A G D K I S I Q W E T W P E S H K - G P V I D Y L A N C G A S G C E S V D K T S L E F F K I D E V G - D G Q K - W G S D Q L I A N N N S - W L V E I P P T I A P G F Y V L R R H E I I A L H     |
| 8. KHE80150.1-Ne     | K A G D K I Q I Q W N G W P O S H K - G P V L S Y L A P C A N T T C A S V D K R K L S W T K I D D S S K G G G P P G R W A T D V L I A Q N N T - W L L G L P N D L E P G P Y V L R R H E L I A L H |
| 9. XP_013949120.1-Ta | P A G G T I V F Q W G P G P W P H P Y G P I I T Y L A Q C S G S - C T N V D K T S L R W V K I Q E S G Y S T Q V - - W A N Q V L I N Q G N K - W S V T I P S S L K A G N Y V I R R H E I I A A H   |
| 10. XP_013954128.1-T | P A G G T I V F Q W G P G P W P H P Y G P I L T Y L A Q C S G S - C T T V D K T S L R W V K I Q E Q G Y N T Q V - - W A Q Q D L I N Q G S K - W T V K I P S S L K P G N Y V I R S E L L A A H     |
| 11. KKO97781.1-Th    | A A G S T I V F S W G P G P W P H P Y G P I L T Y V A Q C S G S - C T A V D K A S L R W V K I Q E S G Y N T Q V - - W A Q Q D L I N Q G N K - W T V K I P S S L K P G N Y V F R N E L L A A H     |
| 12. KNB10101.1-Fo    | K A G S T V N L K W T L W P D S H V - G P V I T Y M A R C P D S G C D A M T Q P T Q K V W F K I Q E A G R D G T S N N W A T S P L M K S G N S G V N Y T I P E C I K P G Y Y L V R R H E L I A L H |
| 13. KHE85853.1-Ne    | A A G S T V L R W T I W P D S H V - G P V I T Y M A R C P D I G C Q D W T P S D K V W F K I K E G G R E G T S N W A A T P L M - T A P A N Y E Y A I P S C L K P G Y Y L V R R H E I I A L H       |
| 14. KHE84465.1-Ne    | R T Y V D G S R P Q F I D K - S H Q - G P I S V Y A K A V S D - - F D Q - S P G G S G W F K I W H D G Y D E S T G K W A V Q K V I D T N G L - L S I S L P T G M P T G A Y L L R T E V I A M Q     |
| 15. EFP92676.1-Ma    | R E W T D G S N S R V I A P - E H K - G P C S V Y L L K K V D D M - Y A N N S A A G P G W F K I W E D G Y D S A S G W C V D K L I D R E G L - L S V R L P E G L P T G Y Y L R P E I L A L H       |
| 16. XP_011411637.1-M | R E W T D G T R P G V I A P - E H K - G P C S V Y L L K K M D D M - Y A D N A A A G P G W F K V W E D G Y D A G S G Q W C V D K L I E K E G L - L S V R L P E G L P A G Y Y L V R P E I L A L H   |
| 17. OAQ68931.1-Pe    | R I Y S D G S R Q G A I A P - G H L - G P C A V Y L K K V D D M - Y A N N S A A G P G W F K I W E D G L D T A S G K W C V D R L I A S K G L - L S V N L P T G L P A G Y Y L V R P E I L A L H     |
| 18. EJP65452.1-Bb    | R L W P N A Q H P G A L D V - G H K - G P C A V Y L K R V D D M - F S E - P A A G D G W F K I W D D G Y D N K T Q E W C S D R L I S H D G L - L S V R L P T G L A P G Y Y L V R P E I L A L H     |
| 19. EGX90755.1-Cm    | R L W P D A Q H P G A I D E - G H K - G P C A V Y L K R V D D M - F A D - P P A G D G W F K I W D D G Y D S E T K E W C S D R L R A H D G L - L S V N L P T G L A P G Y Y L V R P E I L A L H     |
| 20. ET803449.1-Tr    | R L W P D A Q Q P G S I D P - G H L - G P C A V Y L K K V D D M - F S D - S A A G G G W F K I W E D G Y D S E T Q K W C V D R L V K N N G L - L S V R L P R G L P A G Y Y I V R P E I L A L H     |
| 21. XP_013941775.1-T | R L W P D A Q K P G S I D P - G H L - G P C A V Y L K K V D D M - L T D - S A A G D G W F K I W E D G Y N P E T S N N W A T S P L M K S G N S G V N Y T I P O G L P A G Y Y L V R P E I L A L H   |
| 22. XP_013957375.1-T | R L W P D A Q A P G S I D P - G H L - G P C A V Y V K K V D D M - F T E - S A A G A G W F K I W E D G Y D P V T R K W C V D R L V E N N G L - L S V N L P R G L P A G Y Y I V R P E I L A L H     |

|                       |   |   |   |   |   |   |   |   |   |   |   |   |   |   |   |   |   |   |   |   |   |   |   |   |   |   |   |   |   |   |   |   |   |   |   |   |   |   |   |   |   |   |   |   |   |   |   |   |   |   |   |   |   |   |   |   |   |   |   |   |   |   |   |   |   |   |   |   |   |
|-----------------------|---|---|---|---|---|---|---|---|---|---|---|---|---|---|---|---|---|---|---|---|---|---|---|---|---|---|---|---|---|---|---|---|---|---|---|---|---|---|---|---|---|---|---|---|---|---|---|---|---|---|---|---|---|---|---|---|---|---|---|---|---|---|---|---|---|---|---|---|---|
| 1. KKO97863.1-Th      | W | A | V | H | R | D | D | P | Q | Y | F | V | G | C | A | Q | I | F | V | N | S | Q | G | P | L | N | V | P | E | E | L | T | S | I | P | G | Y | V | D | L | S | T | P | G | L | K | Y | D | I | Y | - | Q | N | N | L | P | P | Y | P | I | P | G | P | K | V | Y | I | P | M |
| 2. XP_013944427.1-Ta  | S | A | E | Q | A | D | G | A | Q | N | Y | P | Q | C | F | N | L | A | V | T | G | T | G | S | L | Q | - | P | S | G | - | V | L | A | T | D | L | Y | H | E | T | D | P | G | I | L | F | N | I | Y | - | T | S | S | L | T | - | Y | I | I | P | G | P | T | V | V | S | G | C |
| 3. KKP05760.1-Th      | S | S | G | Q | P | D | G | A | Q | N | Y | P | Q | C | F | N | L | A | V | T | G | T | G | S | L | Q | - | P | T | G | - | V | L | A | T | D | L | Y | H | E | S | D | P | G | I | L | V | N | I | Y | - | T | S | S | L | A | - | Y | T | M | P | G | P | S | V | V | A | G | C |
| 4. XP_013953575.1-Tv  | S | A | G | S | V | D | G | A | Q | N | Y | P | Q | C | F | N | L | A | V | T | G | T | G | S | L | Q | - | P | T | G | - | V | L | G | T | K | L | Y | Q | E | S | D | P | G | I | L | F | N | I | Y | - | T | S | S | L | T | - | Y | T | I | P | G | P | T | V | V | S | G | C |
| 5. OAQ64763.1-Pe      | S | A | G | S | E | N | G | A | Q | A | Y | P | Q | C | F | N | L | K | I | T | G | S | G | S | L | K | - | P | A | G | - | V | K | G | T | A | L | Y | K | A | T | D | P | G | I | L | V | N | I | Y | - | T | S | S | V | N | - | Y | I | V | P | G | P | T | L | V | A | G | C |
| 5. KHE85031.1-Ne      | S | A | G | Q | A | N | G | A | Q | N | Y | P | Q | C | F | N | L | K | V | E | G | S | G | S | T | V | - | P | A | G | - | V | A | G | T | E | L | Y | K | A | T | D | A | G | I | L | F | D | I | Y | - | K | N | D | I | S | - | Y | P | V | P | G | P | S | L | I | A | G | C |
| 7. KHE87501.1-Ne      | S | A | G | Q | P | N | G | A | Q | N | Y | P | Q | C | F | N | I | Q | V | T | G | S | G | T | E | K | - | P | A | G | - | V | K | G | T | A | L | Y | K | P | D | D | A | G | I | S | V | N | I | Y | - | Q | S | L | S | S | - | Y | S | I | P | G | P | A | L | I | K | G | - |
| 8. KHE80150.1-Ne      | Y | A | N | L | K | N | G | A | Q | N | Y | P | Q | C | V | N | L | W | V | E | G | P | G | P | K | A | I | T | V | G | G | V | P | A | T | A | L | Y | K | A | T | D | P | G | V | A | I | D | I | Y | - | T | A | V | L | S | T | Y | V | I | P | G | P | T | L | A | P | E | - |
| 9. XP_013949120.1-Ta  | G | A | G | S | A | D | G | M | Q | N | Y | P | Q | C | I | N | L | A | I | T | G | S | G | T | K | S | L | P | A | G | - | T | A | A | T | A | L | Y | K | P | T | D | P | G | I | L | F | N | P | Y | - | T | T | I | T | N | - | Y | T | I | P | G | P | A | L | W | Q | G | - |
| 10. XP_013954128.1-Tv | G | A | T | S | L | N | G | M | Q | N | Y | P | Q | C | I | N | I | V | V | T | G | S | G | T | K | S | L | P | A | G | - | T | P | A | T | S | L | Y | K | P | T | D | P | G | I | L | F | N | P | Y | - | T | T | I | K | S | - | Y | T | I | P | G | P | A | L | W | V | G | - |
| 11. KKO97781.1-Th     | G | A | S | S | Q | N | G | M | Q | N | Y | P | Q | C | V | N | I | V | V | T | G | S | G | T | K | S | L | P | A | G | - | T | P | A | T | S | L | Y | K | P | T | D | P | G | I | L | F | N | P | Y | - | T | T | I | T | N | - | Y | T | I | P | G | P | A | L | W | Q | G | - |
| 12. KNB10101.1-Fo     | S | A | S | G | Y | P | G | A | Q | F | Y | P | G | C | H | Q | L | K | V | S | G | S | G | S | T | T | - | P | S | N | L | V | A | F | P | G | A | Y | A | S | T | D | P | G | V | T | Y | N | P | Y | - | Q | - | A | T | S | - | Y | K | I | P | G | P | A | V | F | K | C | - |
| 13. KHE85853.1-Ne     | S | A | Y | S | Y | P | G | A | Q | F | Y | P | G | C | H | Q | L | Q | V | T | G | S | G | T | K | T | - | P | S | S | L | V | S | F | P | G | A | Y | K | S | T | D | P | G | V | T | Y | D | A | Y | - | Q | - | A | A | T | - | Y | T | I | P | G | P | A | V | F | T | C | - |
| 14. KHE84465.1-Ne     | N | V | T | T | K | A | D | P | Q | F | Y | V | N | C | A | Q | V | Y | V | Q | G | S | G | P | L | S | I | P | K | D | E | T | S | I | P | G | H | V | H | P | S | D | K | G | L | N | F | N | M | Y | D | M | K | G | L | L | P | Y | Q | I | P | G | P | V | P | F | R | P | V |
| 15. EFY92676.1-Ma     | N | A | - | V | Q | G | D | P | Q | F | Y | L | G | C | A | Q | I | Y | V | Q | D | G | P | L | R | I | P | D | E | N | V | S | I | P | G | H | V | S | A | D | T | P | G | L | T | F | D | I | Y | - | K | K | P | H | G | E | Y | P | I | P | G | P | K | V | F | I | P | M |   |
| 16. XP_011411637.1-Mr | N | A | - | P | O | G | D | P | Q | F | Y | L | G | C | A | Q | I | Y | V | Q | E | D | G | P | L | R | I | P | D | E | N | V | S | I | P | G | H | V | S | A | D | T | P | G | L | T | Y | N | I | Y | - | K | K | S | Q | G | E | Y | P | I | P | G | P | K | V | F | V | P | M |
| 17. OAQ68931.1-Pe     | N | A | - | V | D | G | D | P | Q | F | Y | V | G | C | A | Q | I | Y | V | Q | D | G | P | L | N | I | P | D | G | S | V | S | I | P | G | Y | V | S | A | D | T | P | G | V | K | F | N | I | Y | - | K | K | P | L | P | K | Y | T | I | P | G | P | K | V | F | I | P | M |   |
| 18. EJP65452.1-Bb     | F | A | - | Y | K | G | D | P | Q | F | Y | L | G | C | A | Q | I | F | V | Q | G | A | G | A | S | - | V | P | K | E | M | V | S | I | P | G | Y | V | N | A | D | T | P | G | L | G | F | N | I | H | - | K | D | V | I | P | A | Y | P | M | L | G | P | S | V | Y | A | P | P |
| 19. EGY90755.1-Cm     | F | A | - | Y | K | G | D | P | Q | F | F | L | G | C | A | Q | I | F | V | Q | G | A | G | A | V | - | I | P | K | D | T | V | S | I | P | G | Y | V | N | A | Q | T | P | G | L | G | F | D | I | N | - | K | E | P | L | P | A | Y | P | M | P | G | P | A | V | Y | L | P | P |
| 20. ET803449.1-Tr     | W | A | A | H | R | D | D | P | Q | F | Y | L | G | C | A | Q | I | F | V | D | S | R | G | P | L | E | I | P | R | R | Q | A | T | I | P | G | Y | V | N | A | K | T | P | G | L | T | F | D | I | Y | - | Q | D | K | L | P | P | Y | P | M | P | G | P | K | V | Y | I | P | M |
| 21. XP_013941775.1-Ta | W | A | A | H | R | N | D | P | Q | Y | Y | L | G | C | A | Q | I | F | L | D | S | K | G | A | L | D | V | P | K | E | L | A | T | I | P | G | Y | V | D | L | D | T | P | G | L | T | F | D | V | Y | - | Q | D | D | I | E | Y | Y | P | I | P | G | P | K | V | F | I | P | M |
| 22. XP_013957375.1-Tv | W | A | V | H | R | N | D | P | Q | Y | F | L | G | C | A | Q | I | F | L | N | S | Q | G | P | L | D | V | P | K | D | L | T | S | I | P | G | Y | V | D | A | T | T | P | G | L | T | Y | D | I | Y | - | R | E | D | L | P | P | Y | P | I | P | G | P | K | V | H | V | P | M |



|                       |   |   |   |   |   |   |   |   |   |   |   |   |   |   |   |   |   |   |   |   |   |   |   |   |   |   |   |   |   |   |   |   |   |   |   |   |   |   |   |   |   |   |   |   |   |   |   |   |   |   |   |   |   |   |   |   |   |   |   |   |   |   |   |   |   |   |   |   |   |   |   |   |   |   |   |   |   |   |   |   |   |   |   |   |   |   |   |   |   |   |   |   |   |   |   |
|-----------------------|---|---|---|---|---|---|---|---|---|---|---|---|---|---|---|---|---|---|---|---|---|---|---|---|---|---|---|---|---|---|---|---|---|---|---|---|---|---|---|---|---|---|---|---|---|---|---|---|---|---|---|---|---|---|---|---|---|---|---|---|---|---|---|---|---|---|---|---|---|---|---|---|---|---|---|---|---|---|---|---|---|---|---|---|---|---|---|---|---|---|---|---|---|---|---|
| 1. KKP00250.1-Th      | N | Y | H | N | Q | C | P | N | T | K | L | V | L | V | G | Y | S | Q | G | Q | I | M | D | D | A | L | C | G | G | D | P | N | N | G | Y | P | N | T | A | V | P | L | S | S | A | V | S | A | I | R | A | A | I | F | M | G | D | P | R | Y | V | R | G | L | A | Y | N | V | G | S | C | Q | A | Q | G | F | A | A | R | P | S | G | F | V | C | P | S | G | S | K | I | K |   |   |   |
| 2. XP_013952846.1-Tv  | N | F | H | N | R | C | P | N | T | K | L | V | L | V | G | Y | S | Q | G | Q | I | M | D | D | A | L | C | G | G | D | P | A | E | G | Y | P | N | T | A | V | P | L | S | S | A | V | S | A | I | R | A | A | I | F | M | G | D | P | R | Y | V | R | G | L | A | Y | N | V | G | S | C | Q | A | Q | G | F | A | A | R | P | S | G | F | V | C | P | S | G | S | K | I | K |   |   |   |
| 3. XP_013944991.1-Ta  | N | F | H | N | S | C | P | N | T | K | L | V | L | V | G | Y | S | Q | G | Q | I | F | D | D | A | L | C | G | G | D | P | A | E | G | Y | P | N | T | A | V | P | L | S | S | A | V | S | A | I | K | A | A | I | F | M | G | D | P | R | N | I | H | G | L | S | Y | N | V | G | T | C | T | T | Q | G | F | D | P | R | P | A | G | F | S | C | P | S | A | S | K | I | K |   |   |   |
| 4. XP_013955136.1-Tv  | N | F | H | N | S | C | P | N | T | K | L | V | L | V | G | Y | S | Q | G | Q | I | F | D | D | A | L | C | G | G | D | P | G | E | G | Y | P | N | T | A | V | P | L | S | S | A | V | S | A | I | K | A | A | I | F | M | G | D | P | R | N | I | H | G | L | S | Y | N | V | G | T | C | T | A | Q | G | F | D | P | R | P | A | G | F | V | C | P | S | A | S | K | I | K |   |   |   |
| 5. KKP06491.1-Th      | N | F | H | N | S | C | P | N | T | K | L | V | L | V | G | Y | S | Q | G | Q | I | F | D | D | A | L | C | G | G | D | T | G | E | G | Y | P | N | T | A | V | P | L | S | S | A | V | S | A | I | K | A | A | I | F | M | G | D | P | R | N | I | H | G | L | S | Y | N | V | G | T | C | T | A | Q | G | F | D | P | R | P | A | G | F | V | C | P | S | A | S | K | I | K |   |   |   |
| 6. XP_013939780.1-Ta  | N | F | H | T | S | C | P | N | T | K | L | V | L | V | G | Y | S | Q | G | Q | V | Y | D | V | V | C | G | G | D | P | G | E | G | Y | P | N | T | A | V | P | L | S | S | A | V | S | A | I | K | A | V | I | L | M | G | D | P | R | N | I | A | G | L | P | Y | N | V | G | T | C | K | A | G | G | F | D | A | H | N | A | G | F | Q | C | A | A | S | K | V | Q |   |   |   |   |   |
| 7. KHE88029.1-Nc      | S | L | N | A | R | C | P | N | T | K | L | V | L | V | G | Y | S | Q | G | Q | I | M | D | N | A | V | C | G | G | P | D | S | G | A | G | I | T | S | T | P | G | I | N | A | A | L | N | O | V | K | A | V | I | M | M | G | N | P | R | Y | R | A | G | L | S | Y | N | V | G | T | C | T | A | Y | G | F | D | P | R | P | A | G | Y | T | C | A | S | A | S | K | L | Q |   |   |   |
| 8. OAQ59936.1-Pc      | A | F | H | S | Q | C | P | N | T | K | L | V | L | V | G | Y | S | Q | G | Q | I | M | D | N | A | L | C | G | G | D | P | G | A | G | I | S | D | T | S | V | P | I | S | S | A | V | A | M | I | K | A | A | I | F | M | G | D | P | R | Y | E | Y | G | F | T | Y | E | V | G | T | C | R | A | G | G | F | D | A | R | P | A | S | F | K | C | P | N | A | S | K | L | Q |   |   |   |
| 9. XP_013942820.1-Ta  | N | F | H | N | N | C | P | N | T | K | L | V | L | M | G | Y | S | Q | G | Q | I | I | D | N | A | L | C | G | G | D | P | N | A | G | I | T | N | T | S | I | P | I | S | A | A | A | Q | M | V | K | A | A | I | F | M | G | D | P | R | F | E | Y | G | A | S | Y | E | I | G | T | C | R | L | G | G | F | A | A | R | P | K | G | F | T | C | S | N | G | S | K | I | K |   |   |   |
| 10. XP_013950541.1-Tv | N | F | H | N | N | C | P | N | T | K | L | V | L | M | G | Y | S | Q | G | Q | I | I | D | N | A | L | C | G | G | D | P | N | A | G | I | T | D | L | S | I | P | I | S | A | A | A | Q | M | V | K | A | A | I | F | M | G | D | P | R | F | E | Y | G | F | P | Y | E | I | G | T | C | R | L | G | G | F | A | A | R | P | K | G | F | S | C | S | N | G | S | K | I | K |   |   |   |
| 11. EGX95994.1-Cm     | K | Y | H | Q | D | C | P | G | H | K | M | A | Y | L | G | W | S | Q | G | A | Q | I | A | V | N | A | F | C | G | G | Q | G | I | - | - | - | F | G | D | A | A | A | I | P | A | D | A | V | K | D | V | V | A | I | A | I | F | G | D | P | S | F | N | H | T | A | P | Y | A | K | G | T | S | T | V | D | G | L | F | V | R | N | G | I | G | A | C | A | F | T | N | K | I | V |   |
| 12. KHE85172.1-Nc     | E | Y | H | E | K | C | P | D | T | K | V | A | L | L | G | Y | S | Q | G | A | H | A | M | D | S | I | C | G | G | P | G | E | G | S | D | Y | Q | A | S | K | G | Y | L | E | V | F | N | E | S | V | V | A | A | V | A | Y | G | D | P | S | H | T | A | G | A | P | W | N | L | G | T | S | T | K | T | G | I | F | P | R | N | T | A | S | C | L | F | A | S | H | I | A |   |   |   |
| 13. EFY85649.1-Ma     | D | Y | H | K | S | C | P | D | G | K | V | A | I | L | G | Y | S | Q | G | A | Q | V | S | L | D | T | L | C | G | T | D | E | T | G | - | - | F | T | T | D | A | I | S | S | S | A | V | D | N | V | V | A | V | A | L | F | G | D | P | T | H | I | A | N | V | S | Y | D | R | G | T | S | K | K | N | G | L | F | P | R | N | S | A | S | C | E | Y | A | S | K | I | A |   |   |   |
| 14. XP_007816494.1-Mr | D | Y | H | K | S | C | P | D | G | K | V | A | I | L | G | Y | S | Q | G | A | Q | V | S | L | D | T | L | C | G | T | D | E | T | G | - | - | F | T | T | D | A | I | S | S | S | A | V | D | N | V | V | A | V | A | L | F | G | D | P | T | H | I | A | N | V | S | Y | D | R | G | T | S | K | K | N | G | L | F | P | R | N | S | A | S | C | E | Y | A | S | K | I | A |   |   |   |
| 15. KNB11802.1-Fo     | G | Y | H | S | S | C | P | N | G | K | I | A | V | F | G | Y | S | Q | G | Q | V | A | T | D | V | F | C | G | G | S | - | - | - | - | - | D | N | K | P | L | T | M | S | V | K | D | S | V | V | A | V | A | I | F | G | D | P | S | H | V | A | N | L | T | Y | D | R | G | T | S | K | N | D | G | I | F | E | R | P | S | N | E | T | C | E | Y | S | D | I | R |   |   |   |   |   |
| 16. XP_013947351.1-Ta | A | Y | G | Q | A | C | P | D | S | K | I | A | I | L | G | Y | S | Q | G | A | Q | V | S | D | S | V | C | G | G | A | G | N | P | - | - | F | I | D | D | K | A | L | S | T | S | V | M | D | N | V | V | A | V | A | I | F | G | D | P | T | H | V | A | N | I | T | Y | D | R | G | T | S | V | H | N | G | I | F | N | R | T | D | A | S | L | C | K | Y | A | S | R | I | I |   |   |
| 17. KKP05135.1-Th     | N | Y | G | Q | A | C | P | G | S | K | I | A | I | L | G | Y | S | Q | G | A | Q | V | S | T | D | S | V | C | G | S | A | G | E | P | - | - | F | I | D | D | K | A | M | S | E | E | V | M | N | S | V | V | A | I | A | I | F | G | D | P | T | H | V | A | N | L | T | Y | D | R | G | T | S | V | K | D | G | L | F | N | R | S | S | A | S | V | C | K | Y | A | S | R | I | V |   |
| 18. XP_013958518.1-Tv | N | Y | G | Q | A | C | P | G | S | K | I | A | V | L | G | Y | S | Q | G | A | Q | V | S | T | D | S | I | C | G | G | A | G | E | P | - | - | F | I | D | D | K | A | M | S | E | E | V | M | N | S | V | V | A | V | A | I | F | G | D | P | T | H | V | A | N | L | T | Y | D | R | G | T | S | V | N | D | G | L | F | N | R | S | S | A | S | V | C | K | Y | A | S | R | I | V |   |
| 19. EJP66117.1-Bb     | K | I | L | A | Q | N | P | S | E | C | L | I | L | E | G | Y | S | Q | G | A | T | V | V | V | D | A | L | R | K | L | T | G | P | A | F | D | - | - | A | V | K | G | V | F | L | I | G | N | T | R | H | E | R | G | L | A | C | N | V | D | M | Q | G | G | D | K | T | K | Y | T | T | G | I | L | Y | L | P | G | L | G | I | P | T | D | W | V | P | K | T | V | C | N | Y | G | D |
| 20. EGX96917.1-Cm     | K | I | L | G | Q | N | P | S | E | C | L | L | F | E | G | Y | S | Q | G | A | T | L | V | V | D | A | L | P | R | L | T | G | A | A | F | D | - | - | A | V | K | G | V | F | L | I | G | D | P | R | H | E | P | G | L | A | C | N | V | D | M | Q | G | G | D | K | T | K | D | T | T | G | L | F | Y | D | K | G | K | S | I | P | Q | D | V | V | S | K | S | - | - | - | G | D |   |
| 21. OAQ61494.1-Pc     | G | P | Y | T | A | S | L | A | D | N | F | L | P | A | G | T | S | A | A | A | I | R | E | M | T | R | L | F | N | L | A | N | S | K | - | - | - | C | P | N | A | N | V | V | A | G | Y | S | Q | G | A | A | L | A | A | S | I | S | G | L | S | T | T | V | R | N | Q | V | V | G | T | V | L | F | G | Y | T | K | N | Q | N | G | G | I | P | P | S | D | R | L | K |   |   |   |   |
| 22. KNB19181.1-Fo     | G | A | Y | R | A | T | L | G | D | N | A | L | P | R | G | T | S | A | A | A | I | R | E | M | L | G | H | F | N | D | A | N | O | K | - | - | - | C | P | D | A | V | L | I | A | G | Y | S | Q | G | A | A | L | A | A | S | V | T | D | V | D | A | G | I | R | E | K | I | A | G | V | V | L | F | G | Y | T | K | N | L | Q | N | R | G | I | P | P | E | D | R | T | K |   |   |   |
| 23. KKP01664.1-Th     | G | P | Y | T | A | D | L | A | S | N | F | L | P | G | G | T | S | Q | A | A | I | N | E | A | K | R | L | F | N | Q | A | N | O | K | - | - | - | C | P | N | S | A | I | V | A | G | Y | S | Q | G | T | A | V | M | S | G | S | I | S | G | L | S | T | V | Q | N | O | I | K | G | V | V | L | F | G | Y | T | Q | N | F | Q | N | G | G | I | P | P | S | K | L | D |   |   |   |   |
| 24. XP_013954681.1-Tv | G | P | Y | T | A | D | L | A | S | N | F | L | P | G | G | T | S | Q | A | A | I | N | E | A | R | L | F | N | E | A | N | O | K | - | - | - | C | P | S | S | I | V | A | G | Y | S | Q | G | T | A | V | M | S | G | S | I | S | G | L | S | T | V | Q | N | O | I | K | G | V | V | L | F | G | Y | T | Q | N | F | Q | N | G | G | I | P | P | S | K | L | D |   |   |   |   |   |   |
| 25. EJP70517.1-Bb     | - | - | Y | K | A | D | L | M | E | N | F | T | E | N | G | T | D | D | A | A | I | A | A | L | Q | A | H | L | V | G | A | T | S | K | - | - | - | C | P | T | A | K | I | V | V | A | G | Y | S | Q | G | A | A | V | I | H | A | A | F | K | T | L | P | A | E | A | L | A | R | V | N | A | V | V | T | F | G | D | T | Q | S | K | K | N | A |   |   |   |   |   |   |   |   |   |   |

|                       |   |   |   |   |   |   |   |   |   |   |   |   |   |   |   |   |   |   |   |   |   |   |   |   |   |   |   |   |   |   |   |   |   |   |   |   |   |   |   |
|-----------------------|---|---|---|---|---|---|---|---|---|---|---|---|---|---|---|---|---|---|---|---|---|---|---|---|---|---|---|---|---|---|---|---|---|---|---|---|---|---|---|
| 1. KKP00250.1-Th      | S | Y | C | D | A | S | D | P | Y | C | C | N | G | N | N | A | N | T | H | Q | G | Y | G | Q | E | Y | G | Q | Q | A | L | S | F | V | N | S | K | L | A |
| 2. XP_013952846.1-Tv  | S | Y | C | D | A | S | D | P | Y | C | C | N | G | N | N | A | N | T | H | Q | S | Y | G | Q | V | Y | G | Q | Q | A | L | S | F | V | N | S | R | L | A |
| 3. XP_013944991.1-Ta  | S | Y | C | D | A | S | D | P | Y | C | C | N | G | N | N | P | A | T | H | Q | G | Y | G | Q | E | Y | G | Q | Q | A | L | S | F | I | N | S | K | L | S |
| 4. XP_013955136.1-Tv  | S | Y | C | D | A | P | D | P | Y | C | C | N | G | N | D | A | N | T | H | Q | G | Y | G | Q | E | Y | G | Q | Q | A | L | A | F | I | N | S | K | L | S |
| 5. KKP06491.1-Th      | S | Y | C | D | A | P | D | P | Y | C | C | N | G | N | D | A | N | T | H | Q | G | Y | G | Q | E | Y | G | Q | Q | A | L | A | F | I | N | S | K | L | S |
| 6. XP_013939780.1-Ta  | S | Y | C | D | A | A | D | P | Y | C | C | N | G | N | D | P | N | T | H | Q | G | Y | G | T | E | Y | G | S | Q | A | L | A | F | V | N | S | K | L | S |
| 7. KHE88029.1-Nc      | N | Y | C | D | S | P | D | P | Y | C | C | T | G | N | D | A | N | T | H | Q | G | Y | G | S | K | Y | G | Q | Q | A | L | A | F | V | K | S | K | L | S |
| 8. OAQ59936.1-Pe      | S | Y | C | D | S | Q | D | P | Y | C | C | T | G | N | D | A | N | H | H | Q | Q | Y | V | S | I | Y | G | Q | Q | A | M | T | F | I | N | G | K | L | S |
| 9. XP_013942820.1-Ta  | S | Y | C | D | S | P | D | P | Y | C | C | Q | G | N | D | A | S | A | H | G | A | Y | V | N | V | Y | G | Q | N | A | I | S | F | I | E | S | K | L | N |
| 10. XP_013950541.1-Tv | S | Y | C | D | S | A | D | P | Y | C | C | Q | G | N | D | T | S | A | H | A | A | Y | V | N | V | Y | G | Q | K | A | I | A | F | I | E | A | K | L | N |
| 11. EGX95994.1-Cm     | S | Y | C | D | A | G | D | V | Y | C | S | G | N | N | R | S | V | H | G | L | Y | L | V | N | Y | P | K | Q | M | M | Q | F | V | I | D | G | Y | N |   |
| 12. KHE85172.1-Nc     | S | W | C | D | T | G | D | I | Y | C | D | S | G | S | L | T | V | H | G | S | Y | F | A | N | Y | T | M | D | S | Y | K | W | I | V | E | K | Y | K |   |
| 13. EFX85649.1-Ma     | S | W | C | D | T | G | D | V | Y | C | D | L | G | E | D | K | A | V | H | G | Q | Y | F | S | T | H | G | P | K | I | I | Q | F | I | V | D | K | Y | K |
| 14. XP_007816494.1-Mr | S | W | C | D | T | G | D | V | Y | C | D | L | G | E | D | T | A | V | H | G | Q | Y | F | S | N | Y | G | P | E | I | V | Q | F | I | V | D | K | Y | N |
| 15. KNB11802.1-Fo     | S | Y | C | D | T | G | D | V | Y | C | D | V | G | K | N | N | E | T | H | G | S | Y | F | E | K | Y | G | K | E | V | V | D | F | V | V | E | R | Y | E |
| 16. XP_013947351.1-Ta | S | Y | C | D | T | G | D | I | Y | C | D | S | G | S | N | A | T | V | H | L | Y | I | D | R | Y | G | D | D | I | V | D | F | V | V | S | Q | Y | Q |   |
| 17. KKP05135.1-Th     | S | Y | C | D | K | G | D | I | Y | C | D | S | G | S | N | L | T | V | H | L | Y | I | D | R | Y | G | D | E | I | V | D | F | V | V | S | Q | Y | E |   |
| 18. XP_013958518.1-Tv | S | Y | C | D | K | G | D | I | Y | C | D | A | G | N | Q | T | V | H | L | Y | I | E | R | Y | G | D | E | I | V | D | F | V | V | S | Q | Y | E |   |   |
| 19. EJP66117.1-Bb     | S | Y | C | D | V | D | - | - | S | G | R | G | T | L | I | T | D | Q | H | M | A | Y | P | T | D | A | G | L | Q | D | M | K | F | L | L | K | Q | L | S |
| 20. EGX96917.1-Cm     | S | Y | C | D | V | T | - | - | F | S | N | D | T | L | I | T | E | H | L | A | Y | A | L | D | A | G | M | Q | T | M | A | F | L | L | K | Q | L | S |   |
| 21. OAQ61494.1-Pe     | V | F | C | N | P | G | D | L | V | C | - | V | G | I | T | P | A | H | L | A | Y | G | P | A | A | S | S | T | A | P | Q | F | L | I | S | K | V | T |   |
| 22. KNB19181.1-Fo     | V | F | C | N | T | G | D | L | V | C | - | T | G | S | V | A | A | P | H | L | A | Y | Q | S | A | A | S | G | A | A | P | E | F | L | I | Q | K | A | D |
| 23. KKP01664.1-Th     | V | F | C | A | A | T | D | A | V | C | - | Y | G | T | I | L | P | A | H | F | L | Y | N | D | E | A | A | D | E | A | P | D | F | L | I | S | R | I | G |
| 24. XP_013954681.1-Tv | V | F | C | A | A | T | D | A | V | C | - | Y | G | T | I | L | P | A | H | F | L | Y | T | D | E | A | A | D | E | A | P | D | F | L | I | S | R | I | G |
| 25. EJP70517.1-Bb     | F | I | C | N | K | G | D | T | I | C | E | Q | G | K | Y | D | E | S | H | S | D | Y | D | R | R | A | A | E | A | A | - | D | F | V | F | K | M | L | A |
| 26. KNB11116.1-Fo     | I | I | C | H | A | G | D | G | V | C | - | A | G | T | I | T | P | D | H | L | T | Y | S | Q | D | A | N | A | A | A | - | Q | F | V | V | S | K | V | K |
| 27. KKO97447.1-Th     | V | V | C | H | D | G | D | N | I | C | - | Q | G | G | I | L | L | P | H | L | T | Y | A | E | D | A | D | T | A | A | - | A | F | V | K | P | L | V | S |
| 28. XP_013960136.1-Tv | V | V | C | H | D | G | D | N | I | C | - | Q | G | G | I | L | L | P | H | L | T | Y | A | E | D | A | D | T | A | A | - | A | F | V | K | P | L | V | S |
| 29. ETS02914.1-Tr     | V | V | C | H | D | G | D | N | I | C | - | Q | G | G | I | L | L | P | H | L | T | Y | A | E | D | A | D | T | A | A | - | A | F | V | V | P | L | V | S |
| 30. XP_013940222.1-Ta | T | V | C | H | D | G | D | N | I | C | - | A | G | G | I | L | L | P | H | L | T | Y | A | E | D | A | D | T | A | A | - | A | F | V | A | S | L | V | - |
| 31. EJP63164.1-Bb     | C | I | C | H | L | G | D | I | C | - | D | Q | G | I | F | P | Q | H | L | T | Y | G | I | D | A | T | H | A | A | - | A | F | V | A | S | H | M | - |   |
| 32. EGX92112.1-Cm     | I | V | C | H | G | G | D | N | I | C | - | D | G | G | I | F | P | Q | H | L | T | Y | A | A | D | A | S | S | A | - | A | F | V | A | S | K | V | - |   |
| 33. OAQ63655.1-Pe     | I | V | C | H | K | G | D | N | I | C | - | D | A | G | I | T | L | Q | H | I | T | Y | A | E | D | A | D | S | S | A | - | A | F | V | V | S | K | L | - |
| 34. EFX91898.1-Ma     | I | V | C | H | E | G | D | N | I | C | - | D | G | G | I | T | P | Q | H | I | T | Y | A | V | D | A | D | S | S | A | - | E | F | V | V | S | K | L | - |
| 35. XP_007823100.1-Mr | I | V | C | H | E | G | D | I | C | - | D | G | G | I | T | P | Q | H | I | T | Y | A | E | D | A | E | S | S | A | - | N | F | V | V | S | K | L | - |   |
